# Supplementary material for: Prenatal Exposure to Triclocarban Impairs ESR1 Signaling and Disrupts Epigenetic Status in Sex-Specific Ways as Well as Dysregulates the Expression of Neurogenesis- and Neurotransmitter-Related Genes in the Postnatal Mouse Brain
Source: MDPI journal article supplement (doi:10.3390/ijms222313121), 2021-12-04
Supplement: s1 [file s1]

**Table S1. Prenatal exposure to triclocarban dysregulated the expression of neurogenesis- and neurotransmitter-related genes in the prefrontal cortices of one-month-old male (part a) and female (part b) mice that as determined by microarray analyses.**

**a. Males**

| Gene ontology                         | Set of genes                                                                                                                                                                                                                                                                              |
|---------------------------------------|-------------------------------------------------------------------------------------------------------------------------------------------------------------------------------------------------------------------------------------------------------------------------------------------|
| <b>Upregulated genes</b>              |                                                                                                                                                                                                                                                                                           |
| <b>neurogenesis-related genes</b>     | <i>Artn, Bmp2, Nog, Notch2, Pou4f1 and Sox3</i>                                                                                                                                                                                                                                           |
| <b>neurotransmitter-related genes</b> | <i>Adra1a, Adra2a, Adrb2, Adrb3, Avpr1b, Brs3, Chrm1, Chrm4, Chrm5, Chrna3, Chrna4, Chrna7, Drd5, Gabbr1, Gabbr2, Gabra1, Gabra6, Gabrb1, Gabrd, Gabrg3, Gabrq, Gabrr1, Gria1, Gria2, Gria3, Grik2, Grin1, Grm3, Grm6, Grm7, Grm8, Grpr, Hcrtr2, Hrh1, Npy2r, Npy5r, Tacr1, and Tacr2</i> |
| <b>Downregulated genes</b>            |                                                                                                                                                                                                                                                                                           |
| <b>neurogenesis-related genes</b>     | <i>Adora1, Alk, Apbb1, Ascl1, Bdnf, Bmp4, Bmp8b, Chrm2, Dcx, Drd2, Dvl3, Erbb2, Gdnf, Gpi1, Grin1, Hes1, Hey1, Mdk, Map2, Ndn, Ndp, Nrg1, Ntf3, Ntn1, Olig2, Pard3, Pax6, Rtn4, Slit2, Stat3, Th and Tnr</i>                                                                              |
| <b>neurotransmitter-related genes</b> | <i>Adra1d, Avpr1a, Cckbr, Chrna5, Chrna6, Chrne, Drd2, Gabra2, Gabra5, Gabre, Gcgr, Grm5, Htr2a, Htr3a, Htr4 and Sstr4</i>                                                                                                                                                                |

**b. Females**

| Gene ontology                         | Set of genes                                                                                                                                                                                                                                                                             |
|---------------------------------------|------------------------------------------------------------------------------------------------------------------------------------------------------------------------------------------------------------------------------------------------------------------------------------------|
| <b>Upregulated genes</b>              |                                                                                                                                                                                                                                                                                          |
| <b>neurogenesis-related genes</b>     | <i>Bdnf, Chrm2, Efnb1, Egf, Hes1, Neurog1, Notch2, Nrg1, Nrp1, Ntn1, Pafah1b1, Pax5, Pou3f3, S100b, and Shh</i>                                                                                                                                                                          |
| <b>neurotransmitter-related genes</b> | <i>Adra1d, Chrne, Drd2, Gabra5, Htr2c, Htr4, Oxtr, Prokr2, Sstr4, Tacr3, and Tspo</i>                                                                                                                                                                                                    |
| <b>Downregulated genes</b>            |                                                                                                                                                                                                                                                                                          |
| <b>neurogenesis-related genes</b>     | <i>Adora2a, Ascl1, Bmp2, Cdk5rap2, Cxcl1, Dll1, Drd2, Fgf2, Gdnf, Il3, Neurod1, Neurog2, Nog, Notch1, Nr2e3, Ntf3, Olig2, Pax3, Pou4f1, Sox2, Sox3, and Th</i>                                                                                                                           |
| <b>neurotransmitter-related genes</b> | <i>Adra1a, Adra2a, Adrb2, Adrb3, Avpr1a, Brs3, Cckbr, Chrm1, Chrm4, Chrm5, Chrna3, Chrna4, Chrna5, Chrna7, Cnr1, Drd5, Gabbr1, Gabra1, Gabra4, Gabra6, Gabrb1, Gabrd, Gabrg3, Gria1, Gria2, Grik2, Grin1, Grin2a, Grm3, Grm5, Grm6, Grm7, Grm8, Hcrtr2, Hrh1, Htr2a, Tacr1 and Tacr2</i> |

## Neurogenesis-related genes

| Symbol        | Description                                             |
|---------------|---------------------------------------------------------|
| <i>Adra1a</i> | Adrenergic, alpha-1A-, receptor                         |
| <i>Adra1d</i> | Adrenergic, alpha-1D-, receptor                         |
| <i>Adra2a</i> | Adrenergic, alpha-2A-, receptor                         |
| <i>Adrb2</i>  | Adrenergic, beta-2-, receptor, surface                  |
| <i>Adrb3</i>  | Adrenergic, beta-3-, receptor                           |
| <i>Avpr1a</i> | Arginine vasopressin receptor 1A                        |
| <i>Avpr1b</i> | Arginine vasopressin receptor 1B                        |
| <i>Brs3</i>   | Bombesin-like receptor 3                                |
| <i>Cckbr</i>  | Cholecystokinin B receptor                              |
| <i>Chrm1</i>  | Cholinergic receptor, muscarinic 1                      |
| <i>Chrm4</i>  | Cholinergic receptor, muscarinic 4                      |
| <i>Chrm5</i>  | Cholinergic receptor, muscarinic 5                      |
| <i>Chrna3</i> | Cholinergic receptor, nicotinic, alpha 3                |
| <i>Chrna4</i> | Cholinergic receptor, nicotinic, alpha 4                |
| <i>Chrna5</i> | Cholinergic receptor, nicotinic, alpha 5                |
| <i>Chrna6</i> | Cholinergic receptor, nicotinic, alpha 6                |
| <i>Chrna7</i> | Cholinergic receptor, nicotinic, alpha 7                |
| <i>Chrne</i>  | Cholinergic receptor, nicotinic, epsilon                |
| <i>Cnr1</i>   | Cannabinoid receptor 1 (brain)                          |
| <i>Drd1</i>   | Dopamine receptor D1                                    |
| <i>Drd2</i>   | Dopamine receptor D2                                    |
| <i>Drd5</i>   | Dopamine receptor D5                                    |
| <i>Gabbr1</i> | Gamma-aminobutyric acid (GABA) B receptor, 1            |
| <i>Gabbr2</i> | Gamma-aminobutyric acid (GABA) B receptor, 2            |
| <i>Gabra1</i> | Gamma-aminobutyric acid (GABA) A receptor, alpha 1      |
| <i>Gabra2</i> | Gamma-aminobutyric acid (GABA) A receptor, alpha 2      |
| <i>Gabra4</i> | Gamma-aminobutyric acid (GABA) A receptor, alpha 4      |
| <i>Gabra5</i> | Gamma-aminobutyric acid (GABA) A receptor, alpha 5      |
| <i>Gabra6</i> | Gamma-aminobutyric acid (GABA) A receptor, alpha 6      |
| <i>Gabrb1</i> | Gamma-aminobutyric acid (GABA) A receptor, beta 1       |
| <i>Gabrb3</i> | Gamma-aminobutyric acid (GABA) A receptor, beta 3       |
| <i>Gabrd</i>  | Gamma-aminobutyric acid (GABA) A receptor, delta        |
| <i>Gabre</i>  | Gamma-aminobutyric acid (GABA) A receptor, epsilon      |
| <i>Gabrg1</i> | Gamma-aminobutyric acid (GABA) A receptor, gamma 1      |
| <i>Gabrg2</i> | Gamma-aminobutyric acid (GABA) A receptor, gamma 2      |
| <i>Gabrg3</i> | Gamma-aminobutyric acid (GABA) A receptor, gamma 3      |
| <i>Gabrq</i>  | Gamma-aminobutyric acid (GABA) receptor, theta          |
| <i>Gabrr1</i> | Gamma-aminobutyric acid (GABA) receptor, rho 1          |
| <i>Gabrr2</i> | Gamma-aminobutyric acid (GABA) receptor, rho 2          |
| <i>Gcgr</i>   | Glucagon receptor                                       |
| <i>Gria1</i>  | Glutamate receptor, ionotropic, AMPA 1                  |
| <i>Gria2</i>  | Glutamate receptor, ionotropic, AMPA 2                  |
| <i>Gria3</i>  | Glutamate receptor, ionotropic, AMPA 3                  |
| <i>Grik1</i>  | Glutamate receptor, ionotropic, kainate 1               |
| <i>Grik2</i>  | Glutamate receptor, ionotropic, kainate 2               |
| <i>Grik4</i>  | Glutamate receptor, ionotropic, kainate 4               |
| <i>Grik5</i>  | Glutamate receptor, ionotropic, kainate 5               |
| <i>Grin1</i>  | Glutamate receptor, ionotropic, N-methyl D-aspartate 1  |
| <i>Grin2a</i> | Glutamate receptor, ionotropic, N-methyl D-aspartate 2A |
| <i>Grin2b</i> | Glutamate receptor, ionotropic, N-methyl D-aspartate 2B |

## Supplementary material 1 – S1

|               |                                                                        |
|---------------|------------------------------------------------------------------------|
| <i>Grin2c</i> | Glutamate receptor, ionotropic, N-methyl D-aspartate 2C                |
| <i>Grm1</i>   | Glutamate receptor, metabotropic 1                                     |
| <i>Grm3</i>   | Glutamate receptor, metabotropic 3                                     |
| <i>Grm4</i>   | Glutamate receptor, metabotropic 4                                     |
| <i>Grm5</i>   | Glutamate receptor, metabotropic 5                                     |
| <i>Grm6</i>   | Glutamate receptor, metabotropic 6                                     |
| <i>Grm7</i>   | Glutamate receptor, metabotropic 7                                     |
| <i>Grm8</i>   | Glutamate receptor, metabotropic 8                                     |
| <i>Grpr</i>   | Gastrin-releasing peptide receptor                                     |
| <i>Hcrt2</i>  | Hypocretin (orexin) receptor 2                                         |
| <i>Hrh1</i>   | Histamine receptor H1                                                  |
| <i>Hrh4</i>   | Histamine receptor H4                                                  |
| <i>Htr1a</i>  | 5-hydroxytryptamine (serotonin) receptor 1A                            |
| <i>Htr1b</i>  | 5-hydroxytryptamine (serotonin) receptor 1B                            |
| <i>Htr1d</i>  | 5-hydroxytryptamine (serotonin) receptor 1D                            |
| <i>Htr1f</i>  | 5-hydroxytryptamine (serotonin) receptor 1F                            |
| <i>Htr2a</i>  | 5-hydroxytryptamine (serotonin) receptor 2A                            |
| <i>Htr2c</i>  | 5-hydroxytryptamine (serotonin) receptor 2C                            |
| <i>Htr3a</i>  | 5-hydroxytryptamine (serotonin) receptor 3A                            |
| <i>Htr4</i>   | 5-hydroxytryptamine (serotonin) receptor 4                             |
| <i>Htr7</i>   | 5-hydroxytryptamine (serotonin) receptor 7 (adenylate cyclase-coupled) |
| <i>Npy2r</i>  | Neuropeptide Y receptor Y2                                             |
| <i>Npy5r</i>  | Neuropeptide Y receptor Y5                                             |
| <i>Ntsr2</i>  | Neurotensin receptor 2                                                 |
| <i>Oxtr</i>   | Oxytocin receptor                                                      |
| <i>Prokr2</i> | Prokineticin receptor 2                                                |
| <i>Sctr</i>   | Secretin receptor                                                      |
| <i>Sstr1</i>  | Somatostatin receptor 1                                                |
| <i>Sstr2</i>  | Somatostatin receptor 2                                                |
| <i>Sstr4</i>  | Somatostatin receptor 4                                                |
| <i>Tacr1</i>  | Tachykinin receptor 1                                                  |
| <i>Tacr2</i>  | Tachykinin receptor 2                                                  |
| <i>Tacr3</i>  | Tachykinin receptor 3                                                  |
| <i>Tspo</i>   | Translocator protein (18kDa)                                           |

## Neurotransmitter-related genes

| Symbol         | Description                                                     |
|----------------|-----------------------------------------------------------------|
| <i>Ache</i>    | Acetylcholinesterase                                            |
| <i>Adora1</i>  | Adenosine A1 receptor                                           |
| <i>Adora2a</i> | Adenosine A2a receptor                                          |
| <i>Alk</i>     | Anaplastic lymphoma kinase                                      |
| <i>Apbb1</i>   | Amyloid beta (A4) precursor protein-binding, family B, member 1 |
| <i>Apoe</i>    | Apolipoprotein E                                                |
| <i>App</i>     | Amyloid beta (A4) precursor protein                             |
| <i>Artn</i>    | Artemin                                                         |
| <i>Ascl1</i>   | Achaete-scute complex homolog 1 (Drosophila)                    |
| <i>Bcl2</i>    | B-cell leukemia/lymphoma 2                                      |
| <i>Bdnf</i>    | Brain derived neurotrophic factor                               |
| <i>Bmp2</i>    | Bone morphogenetic protein 2                                    |

Supplementary material 1 – S1

|                 |                                                                                                                |
|-----------------|----------------------------------------------------------------------------------------------------------------|
| <i>Bmp4</i>     | Bone morphogenetic protein 4                                                                                   |
| <i>Bmp8b</i>    | Bone morphogenetic protein 8b                                                                                  |
| <i>Cdk5r1</i>   | Cyclin-dependent kinase 5, regulatory subunit 1 (p35)                                                          |
| <i>Cdk5rap2</i> | CDK5 regulatory subunit associated protein 2                                                                   |
| <i>Chrm2</i>    | Cholinergic receptor, muscarinic 2, cardiac                                                                    |
| <i>Creb1</i>    | CAMP responsive element binding protein 1                                                                      |
| <i>Cxcl1</i>    | Chemokine (C-X-C motif) ligand 1                                                                               |
| <i>Dcx</i>      | Doublecortin                                                                                                   |
| <i>Dlg4</i>     | Discs, large homolog 4 (Drosophila)                                                                            |
| <i>Dll1</i>     | Delta-like 1 (Drosophila)                                                                                      |
| <i>Drd2</i>     | Dopamine receptor D2                                                                                           |
| <i>Dvl3</i>     | Dishevelled 3, dsh homolog (Drosophila)                                                                        |
| <i>Efnb1</i>    | Ephrin B1                                                                                                      |
| <i>Egf</i>      | Epidermal growth factor                                                                                        |
| <i>Ep300</i>    | E1A binding protein p300                                                                                       |
| <i>ErbB2</i>    | V-erb-b2 erythroblastic leukemia viral oncogene homolog 2, neuro/glioblastoma derived oncogene homolog (avian) |
| <i>Fgf2</i>     | Fibroblast growth factor 2                                                                                     |
| <i>Flna</i>     | Filamin, alpha                                                                                                 |
| <i>Gdnf</i>     | Glial cell line derived neurotrophic factor                                                                    |
| <i>Gpi1</i>     | Glucose phosphate isomerase 1                                                                                  |
| <i>Grin1</i>    | Glutamate receptor, ionotropic, NMDA1 (zeta 1)                                                                 |
| <i>Hdac4</i>    | Histone deacetylase 4                                                                                          |
| <i>Hes1</i>     | Hairy and enhancer of split 1 (Drosophila)                                                                     |
| <i>Hey1</i>     | Hairy/enhancer-of-split related with YRPW motif 1                                                              |
| <i>Hey2</i>     | Hairy/enhancer-of-split related with YRPW motif 2                                                              |
| <i>Heyl</i>     | Hairy/enhancer-of-split related with YRPW motif-like                                                           |
| <i>Il3</i>      | Interleukin 3                                                                                                  |
| <i>Mdk</i>      | Midkine                                                                                                        |
| <i>Mef2c</i>    | Myocyte enhancer factor 2C                                                                                     |
| <i>Kmt2a</i>    | Myeloid/lymphoid or mixed-lineage leukemia 1                                                                   |
| <i>Map2</i>     | Microtubule-associated protein 2                                                                               |
| <i>Ndn</i>      | Necdin                                                                                                         |
| <i>Ndp</i>      | Norrie disease (pseudoglioma) (human)                                                                          |
| <i>Neurod1</i>  | Neurogenic differentiation 1                                                                                   |
| <i>Neurog1</i>  | Neurogenin 1                                                                                                   |
| <i>Neurog2</i>  | Neurogenin 2                                                                                                   |
| <i>Nf1</i>      | Neurofibromatosis 1                                                                                            |
| <i>Nog</i>      | Noggin                                                                                                         |
| <i>Notch1</i>   | Notch gene homolog 1 (Drosophila)                                                                              |
| <i>Notch2</i>   | Notch gene homolog 2 (Drosophila)                                                                              |
| <i>Nr2e3</i>    | Nuclear receptor subfamily 2, group E, member 3                                                                |
| <i>Nrcam</i>    | Neuron-glia-CAM-related cell adhesion molecule                                                                 |
| <i>Nrg1</i>     | Neuregulin 1                                                                                                   |
| <i>Nrp1</i>     | Neuropilin 1                                                                                                   |

Supplementary material 1 – S1

|                 |                                                                   |
|-----------------|-------------------------------------------------------------------|
| <i>Nrp2</i>     | Neuropilin 2                                                      |
| <i>Ntf3</i>     | Neurotrophin 3                                                    |
| <i>Ntn1</i>     | Netrin 1                                                          |
| <i>Tenm1</i>    | Odd Oz/ten-m homolog 1 (Drosophila)                               |
| <i>Olig2</i>    | Oligodendrocyte transcription factor 2                            |
| <i>Pafah1b1</i> | Platelet-activating factor acetylhydrolase, isoform 1b, subunit 1 |
| <i>Pard3</i>    | Par-3 (partitioning defective 3) homolog (C. elegans)             |
| <i>Pax3</i>     | Paired box gene 3                                                 |
| <i>Pax5</i>     | Paired box gene 5                                                 |
| <i>Pax6</i>     | Paired box gene 6                                                 |
| <i>Pou3f3</i>   | POU domain, class 3, transcription factor 3                       |
| <i>Pou4f1</i>   | POU domain, class 4, transcription factor 1                       |
| <i>Ptn</i>      | Pleiotrophin                                                      |
| <i>Rac1</i>     | RAS-related C3 botulinum substrate 1                              |
| <i>Robo1</i>    | Roundabout homolog 1 (Drosophila)                                 |
| <i>Rtn4</i>     | Reticulon 4                                                       |
| <i>S100a6</i>   | S100 calcium binding protein A6 (calcyclin)                       |
| <i>S100b</i>    | S100 protein, beta polypeptide, neural                            |
| <i>Shh</i>      | Sonic hedgehog                                                    |
| <i>Slit2</i>    | Slit homolog 2 (Drosophila)                                       |
| <i>Sod1</i>     | Superoxide dismutase 1, soluble                                   |
| <i>Sox2</i>     | SRY-box containing gene 2                                         |
| <i>Sox3</i>     | SRY-box containing gene 3                                         |
| <i>Stat3</i>    | Signal transducer and activator of transcription 3                |
| <i>Tgfb1</i>    | Transforming growth factor, beta 1                                |
| <i>Th</i>       | Tyrosine hydroxylase                                              |
| <i>Tnr</i>      | Tenascin R                                                        |
| <i>Vegfa</i>    | Vascular endothelial growth factor A                              |
| <i>Actb</i>     | Actin, beta                                                       |
| <i>B2m</i>      | Beta-2 microglobulin                                              |
| <i>Gapdh</i>    | Glyceraldehyde-3-phosphate dehydrogenase                          |
| <i>Gusb</i>     | Glucuronidase, beta                                               |
| <i>Hsp90ab1</i> | Heat shock protein 90 alpha (cytosolic), class B member 1         |

**Table S2: Primer sets**

## Primer sets

| Target Gene     | Source                                        |
|-----------------|-----------------------------------------------|
| <i>Ahr</i>      | Thermo Fisher Scientific, USA - Mm01291777_m1 |
| <i>Arnt</i>     | Thermo Fisher Scientific, USA - Mm00507836_m1 |
| <i>Atg7</i>     | Thermo Fisher Scientific, USA - Mm00512209_m1 |
| <i>B2m</i>      | Thermo Fisher Scientific, USA - Mm00437762_m1 |
| <i>Bax</i>      | Thermo Fisher Scientific, USA - Mm00432051_m1 |
| <i>Bcl2</i>     | Thermo Fisher Scientific, USA - Mm00477631_m1 |
| <i>Becn1</i>    | Thermo Fisher Scientific, USA - Mm01265461_m1 |
| <i>Car</i>      | Thermo Fisher Scientific, USA - Mm01283978_m1 |
| <i>Cyp19a1</i>  | Thermo Fisher Scientific, USA - Mm00484049_m1 |
| <i>Cyp1a1</i>   | Thermo Fisher Scientific, USA - Mm00487218_m1 |
| <i>Esr1</i>     | Thermo Fisher Scientific, USA - Mm00433149_m1 |
| <i>Esr2</i>     | Thermo Fisher Scientific, USA - Mm00599821_m1 |
| <i>Gapdh</i>    | Thermo Fisher Scientific, USA - Mm05724508_g1 |
| <i>Gper1</i>    | Thermo Fisher Scientific, USA - Mm01194815_m1 |
| <i>Gsk3b</i>    | Thermo Fisher Scientific, USA - Mm00444911_m1 |
| <i>Hprt</i>     | Thermo Fisher Scientific, USA - Mm03024075_m1 |
| <i>Map1lc3a</i> | Thermo Fisher Scientific, USA - Mm00458724_m1 |
| <i>Map1lc3b</i> | Thermo Fisher Scientific, USA - Mm00782868_sH |
| <i>Nup62</i>    | Thermo Fisher Scientific, USA - Mm01700766_m1 |

## Gene-specific primers

| Target Gene  | Source                                                                                                                |
|--------------|-----------------------------------------------------------------------------------------------------------------------|
| <i>Esr1</i>  | Thermo Fisher Scientific, USA<br>M Probe – CAACAAATTAACCGAAACCCGCTAACCTAA<br>U Probe - CAACAAATTAACCAAAACCCACTAACCTAA |
| <i>Esr2</i>  | Thermo Fisher Scientific, USA<br>M Probe - TCCAATAAATCTAATTACACGACGCGAAAA<br>U Probe - TCCAATAAATCTAATTACACAACACAAAA  |
| <i>Gper1</i> | Thermo Fisher Scientific, USA<br>M Probe – AAAACAAAAACACCCGCCCGATACCTAAAA<br>U Probe - AAAACAAAAACACCCACCCAATACCTAAAA |

## Enrichment analyzes – downregulated genes in the prefrontal cortices of one-month-old males that were prenatally exposed to the triclocarban

### Curated reactome

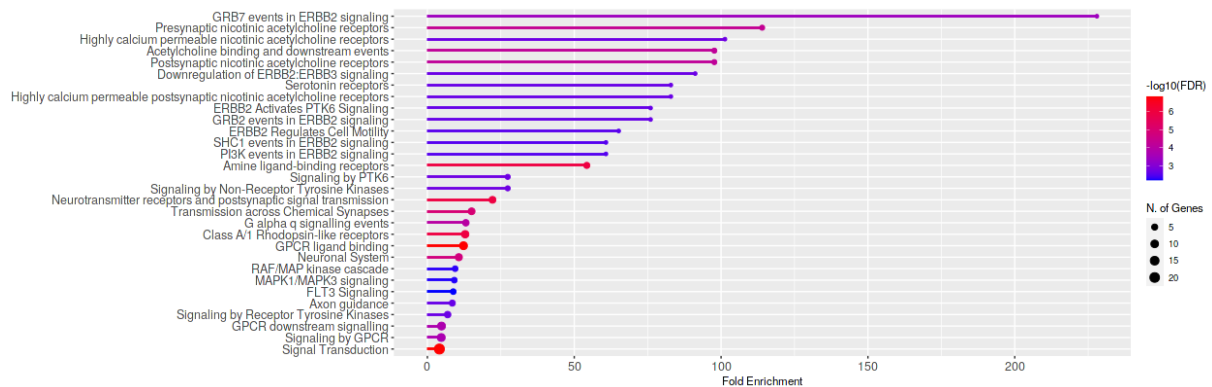

### GO Cellular Component

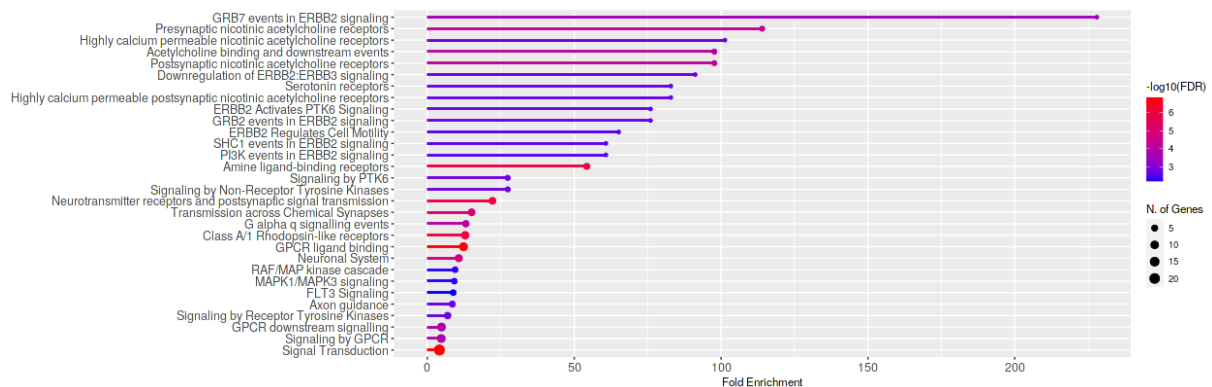

### GO Molecular Function

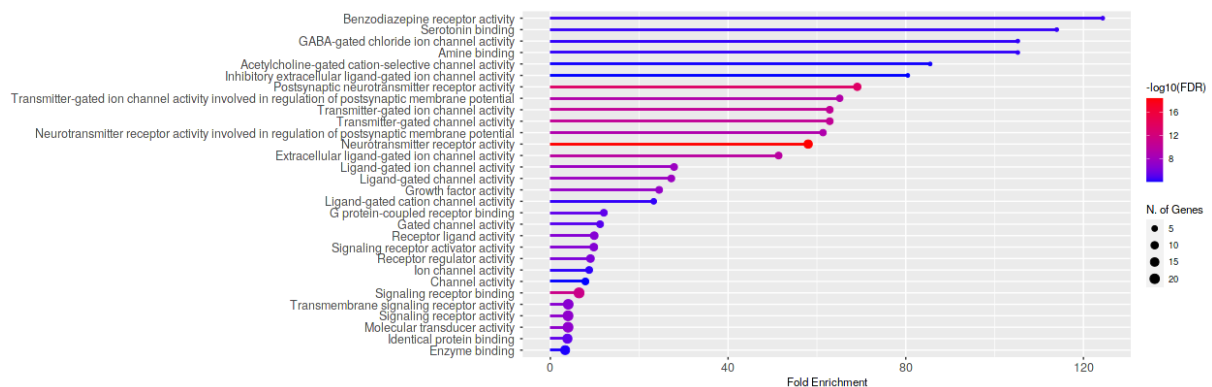

## KEGG

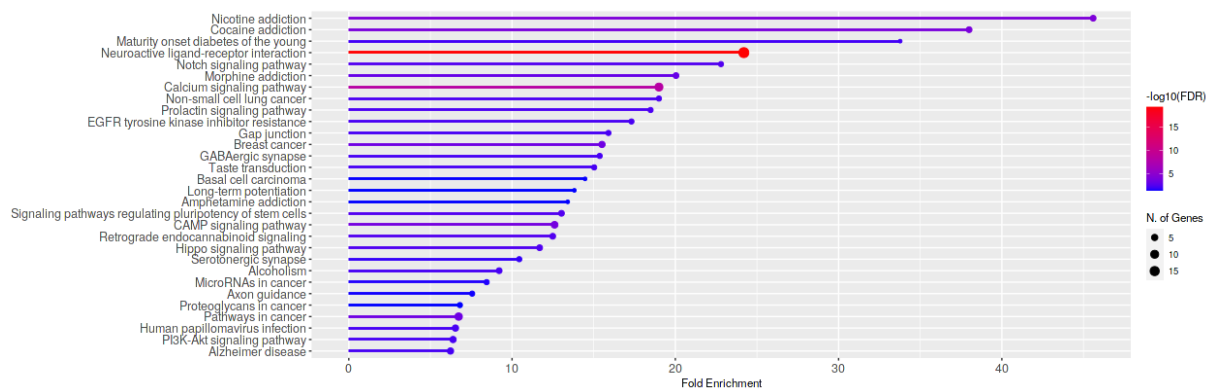

## KEGG pathway – Neuroactive ligand-receptor interaction

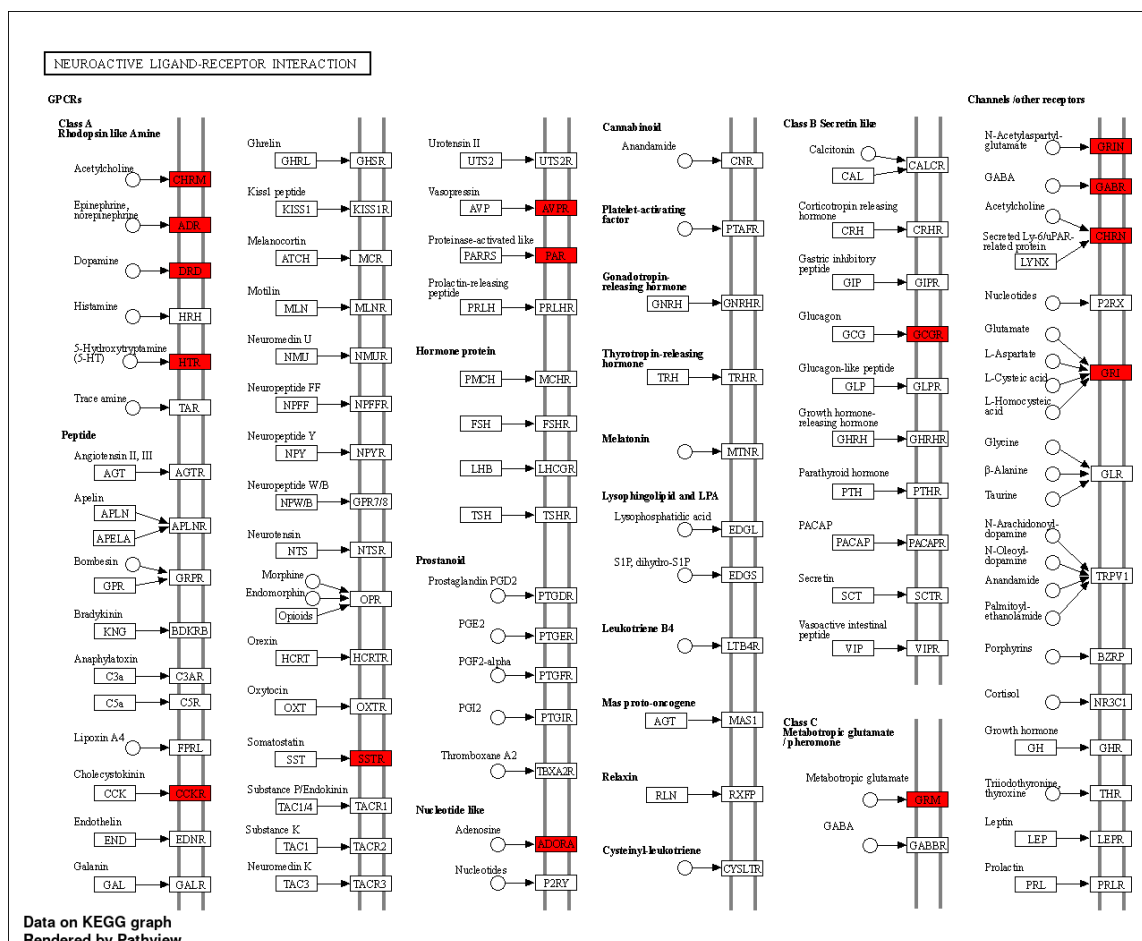



## Supplementary material 3 – S3

## g:Profiler - g:GOSt

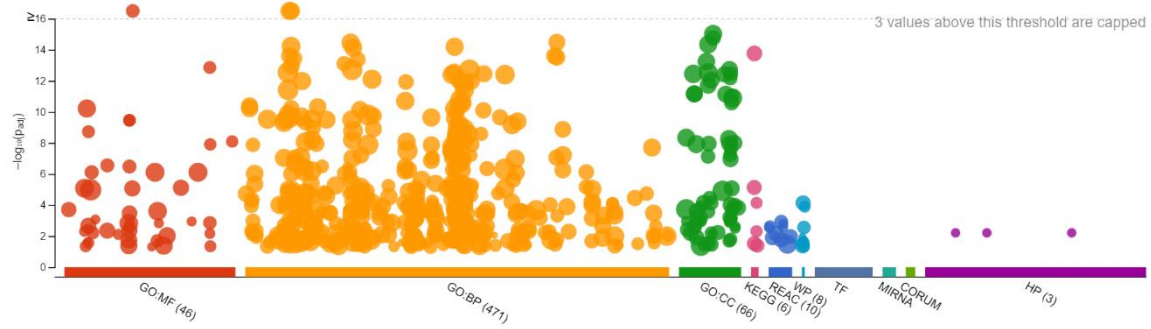

|          |                       |
|----------|-----------------------|
| version  | e104_eg51_p15_3922dba |
| date     | 8.11.2021, 14:08:00   |
| organism | mmusculus             |

g:Profiler

[illegible]

## Supplementary material 3 – S3

| GO-BP |  | stats |  |  |  |  |  |  |  |  |  |  |  |  |  |  |  |  |  |  |  |  |  |  |  |  |  |  |  |  |  |  |  |  |  |  |  |  |  |  |  |  |  |  |  |  |  |  |  |  |  |  |  |  |  |  |  |  |  |  |  |  |  |  |  |  |  |  |  |  |  |  |  |  |  |  |  |  |  |  |  |  |  |  |  |  |  |  |  |  |  |  |  |  |  |  |  |  |  |  |  |  |  |  |  |  |  |  |  |  |  |  |  |  |  |  |  |  |  |  |  |  |  |  |  |  |  |  |  |  |  |  |  |  |  |  |  |  |  |  |  |  |  |  |  |  |  |  |  |  |  |  |  |  |  |  |  |  |  |  |  |  |  |  |  |  |  |  |  |  |  |  |  |  |  |  |  |  |  |  |  |  |  |  |  |  |  |  |  |  |  |  |  |  |  |  |  |  |  |  |  |  |  |  |  |  |  |  |  |  |  |  |  |  |  |  |  |  |  |  |  |  |  |  |  |  |  |  |  |  |  |  |  |  |  |  |  |  |  |  |  |  |  |  |  |  |  |  |  |  |  |  |  |  |  |  |  |  |  |  |  |  |  |  |  |  |  |  |  |  |  |  |  |  |  |  |  |  |  |  |  |  |  |  |  |  |  |  |  |  |  |  |  |  |  |  |  |  |  |  |  |  |  |  |  |  |  |  |  |  |  |  |  |  |  |  |  |  |  |  |  |  |  |  |  |  |  |  |  |  |  |  |  |  |  |  |  |  |  |  |  |  |  |  |  |  |  |  |  |  |  |  |  |  |  |  |  |  |  |  |  |  |  |  |  |  |  |  |  |  |  |  |  |  |  |  |  |  |  |  |  |  |  |  |  |  |  |  |  |  |  |  |  |  |  |  |  |  |  |  |  |  |  |  |  |  |  |  |  |  |  |  |  |  |  |  |  |  |  |  |  |  |  |  |  |  |  |  |  |  |  |  |  |  |  |  |  |  |  |  |  |  |  |  |  |  |  |  |  |  |  |  |  |  |  |  |  |  |  |  |  |  |  |  |  |  |  |  |  |  |  |  |  |  |  |  |  |  |  |  |  |  |  |  |  |  |  |  |  |  |  |  |  |  |  |  |  |  |  |  |  |  |  |  |  |  |  |  |  |  |  |  |  |  |  |  |  |  |  |  |  |  |  |  |  |  |  |  |  |  |  |  |  |  |  |  |  |  |  |  |  |  |  |  |  |  |  |  |  |  |  |  |  |  |  |  |  |  |  |  |  |  |  |  |  |  |  |  |  |  |  |  |  |  |  |  |  |  |  |  |  |  |  |  |  |  |  |  |  |  |  |  |  |  |  |  |  |  |  |  |  |  |  |  |  |  |  |  |  |  |  |  |  |  |  |  |  |  |  |  |  |  |  |  |  |  |  |  |  |  |  |  |  |  |  |  |  |  |  |  |  |  |  |  |  |  |  |  |  |  |  |  |  |  |  |  |  |  |  |  |  |  |  |  |  |  |  |  |  |  |  |  |  |  |  |  |  |  |  |  |  |  |  |  |  |  |  |  |  |  |  |  |  |  |  |  |  |  |  |  |  |  |  |  |  |  |  |  |  |  |  |  |  |  |  |  |  |  |  |  |  |  |  |  |  |  |  |  |  |  |  |  |  |  |  |  |  |  |  |  |  |  |  |  |  |  |  |  |  |  |  |  |  |  |  |  |  |  |  |  |  |  |  |  |  |  |  |  |  |  |  |  |  |  |  |  |  |  |  |  |  |  |  |  |  |  |  |  |  |  |  |  |  |  |  |  |  |  |  |  |  |  |  |  |  |  |  |  |  |  |  |  |  |  |  |  |  |  |  |  |  |  |  |  |  |  |  |  |  |  |  |  |  |  |  |  |  |  |  |  |  |  |  |  |  |  |  |  |  |  |  |  |  |  |  |  |  |  |  |  |  |  |  |  |  |  |  |  |  |  |  |  |  |  |  |  |  |  |  |  |  |  |  |  |  |  |  |  |  |  |  |  |  |  |  |  |  |  |  |  |  |  |  |  |  |  |  |  |  |  |  |  |  |  |  |  |  |  |  |  |  |  |  |  |  |  |  |  |  |  |  |  |  |  |  |  |  |  |  |  |  |  |  |  |  |  |  |  |  |  |  |  |  |  |  |  |  |  |  |  |  |  |  |  |  |  |  |  |  |  |  |  |  |  |  |  |  |  |  |  |  |  |  |  |  |  |  |  |  |  |  |  |  |  |  |  |  |  |  |  |  |  |  |  |  |  |  |  |  |  |  |  |  |  |  |  |  |  |  |  |  |  |  |  |  |  |  |  |  |  |  |  |  |  |  |  |  |  |  |  |  |  |  |  |  |  |  |  |  |  |  |  |  |  |  |  |  |  |  |  |  |  |  |  |  |  |  |  |  |  |  |  |  |  |  |  |  |  |  |  |  |  |  |  |  |  |  |  |  |  |  |  |  |  |  |  |  |  |  |  |  |  |  |  |  |  |  |  |  |  |  |  |  |  |  |  |  |  |  |  |  |  |  |  |  |  |  |  |  |  |  |  |  |  |  |  |  |  |  |  |  |  |  |  |  |  |  |  |  |  |  |  |  |  |  |  |  |  |  |  |  |  |  |  |  |  |  |  |  |  |  |  |  |  |  |  |  |  |  |  |  |  |  |  |  |  |  |  |  |  |  |  |  |  |  |  |  |  |  |  |  |  |  |  |  |  |  |  |  |  |  |  |  |  |  |  |  |  |  |  |  |  |  |  |  |  |  |  |  |  |  |  |  |  |  |  |  |  |  |  |  |  |  |  |  |  |  |  |  |  |  |  |  |  |  |  |  |  |  |  |  |  |  |  |  |  |  |  |  |  |  |  |  |  |  |  |  |  |  |  |  |  |  |  |  |  |  |  |  |  |  |  |  |  |  |  |  |  |  |  |  |  |  |  |  |  |  |  |  |  |  |  |  |  |  |  |  |  |  |  |  |  |  |  |  |  |  |  |  |  |  |  |  |  |  |  |  |  |  |  |  |  |  |  |  |  |  |  |  |  |  |  |  |  |  |  |  |  |  |  |  |  |  |  |  |  |  |  | </ |
|-------|--|-------|--|--|--|--|--|--|--|--|--|--|--|--|--|--|--|--|--|--|--|--|--|--|--|--|--|--|--|--|--|--|--|--|--|--|--|--|--|--|--|--|--|--|--|--|--|--|--|--|--|--|--|--|--|--|--|--|--|--|--|--|--|--|--|--|--|--|--|--|--|--|--|--|--|--|--|--|--|--|--|--|--|--|--|--|--|--|--|--|--|--|--|--|--|--|--|--|--|--|--|--|--|--|--|--|--|--|--|--|--|--|--|--|--|--|--|--|--|--|--|--|--|--|--|--|--|--|--|--|--|--|--|--|--|--|--|--|--|--|--|--|--|--|--|--|--|--|--|--|--|--|--|--|--|--|--|--|--|--|--|--|--|--|--|--|--|--|--|--|--|--|--|--|--|--|--|--|--|--|--|--|--|--|--|--|--|--|--|--|--|--|--|--|--|--|--|--|--|--|--|--|--|--|--|--|--|--|--|--|--|--|--|--|--|--|--|--|--|--|--|--|--|--|--|--|--|--|--|--|--|--|--|--|--|--|--|--|--|--|--|--|--|--|--|--|--|--|--|--|--|--|--|--|--|--|--|--|--|--|--|--|--|--|--|--|--|--|--|--|--|--|--|--|--|--|--|--|--|--|--|--|--|--|--|--|--|--|--|--|--|--|--|--|--|--|--|--|--|--|--|--|--|--|--|--|--|--|--|--|--|--|--|--|--|--|--|--|--|--|--|--|--|--|--|--|--|--|--|--|--|--|--|--|--|--|--|--|--|--|--|--|--|--|--|--|--|--|--|--|--|--|--|--|--|--|--|--|--|--|--|--|--|--|--|--|--|--|--|--|--|--|--|--|--|--|--|--|--|--|--|--|--|--|--|--|--|--|--|--|--|--|--|--|--|--|--|--|--|--|--|--|--|--|--|--|--|--|--|--|--|--|--|--|--|--|--|--|--|--|--|--|--|--|--|--|--|--|--|--|--|--|--|--|--|--|--|--|--|--|--|--|--|--|--|--|--|--|--|--|--|--|--|--|--|--|--|--|--|--|--|--|--|--|--|--|--|--|--|--|--|--|--|--|--|--|--|--|--|--|--|--|--|--|--|--|--|--|--|--|--|--|--|--|--|--|--|--|--|--|--|--|--|--|--|--|--|--|--|--|--|--|--|--|--|--|--|--|--|--|--|--|--|--|--|--|--|--|--|--|--|--|--|--|--|--|--|--|--|--|--|--|--|--|--|--|--|--|--|--|--|--|--|--|--|--|--|--|--|--|--|--|--|--|--|--|--|--|--|--|--|--|--|--|--|--|--|--|--|--|--|--|--|--|--|--|--|--|--|--|--|--|--|--|--|--|--|--|--|--|--|--|--|--|--|--|--|--|--|--|--|--|--|--|--|--|--|--|--|--|--|--|--|--|--|--|--|--|--|--|--|--|--|--|--|--|--|--|--|--|--|--|--|--|--|--|--|--|--|--|--|--|--|--|--|--|--|--|--|--|--|--|--|--|--|--|--|--|--|--|--|--|--|--|--|--|--|--|--|--|--|--|--|--|--|--|--|--|--|--|--|--|--|--|--|--|--|--|--|--|--|--|--|--|--|--|--|--|--|--|--|--|--|--|--|--|--|--|--|--|--|--|--|--|--|--|--|--|--|--|--|--|--|--|--|--|--|--|--|--|--|--|--|--|--|--|--|--|--|--|--|--|--|--|--|--|--|--|--|--|--|--|--|--|--|--|--|--|--|--|--|--|--|--|--|--|--|--|--|--|--|--|--|--|--|--|--|--|--|--|--|--|--|--|--|--|--|--|--|--|--|--|--|--|--|--|--|--|--|--|--|--|--|--|--|--|--|--|--|--|--|--|--|--|--|--|--|--|--|--|--|--|--|--|--|--|--|--|--|--|--|--|--|--|--|--|--|--|--|--|--|--|--|--|--|--|--|--|--|--|--|--|--|--|--|--|--|--|--|--|--|--|--|--|--|--|--|--|--|--|--|--|--|--|--|--|--|--|--|--|--|--|--|--|--|--|--|--|--|--|--|--|--|--|--|--|--|--|--|--|--|--|--|--|--|--|--|--|--|--|--|--|--|--|--|--|--|--|--|--|--|--|--|--|--|--|--|--|--|--|--|--|--|--|--|--|--|--|--|--|--|--|--|--|--|--|--|--|--|--|--|--|--|--|--|--|--|--|--|--|--|--|--|--|--|--|--|--|--|--|--|--|--|--|--|--|--|--|--|--|--|--|--|--|--|--|--|--|--|--|--|--|--|--|--|--|--|--|--|--|--|--|--|--|--|--|--|--|--|--|--|--|--|--|--|--|--|--|--|--|--|--|--|--|--|--|--|--|--|--|--|--|--|--|--|--|--|--|--|--|--|--|--|--|--|--|--|--|--|--|--|--|--|--|--|--|--|--|--|--|--|--|--|--|--|--|--|--|--|--|--|--|--|--|--|--|--|--|--|--|--|--|--|--|--|--|--|--|--|--|--|--|--|--|--|--|--|--|--|--|--|--|--|--|--|--|--|--|--|--|--|--|--|--|--|--|--|--|--|--|--|--|--|--|--|--|--|--|--|--|--|--|--|--|--|--|--|--|--|--|--|--|--|--|--|--|--|--|--|--|--|--|--|--|--|--|--|--|--|--|--|--|--|--|--|--|--|--|--|--|--|--|--|--|--|--|--|--|--|--|--|--|--|--|--|--|--|--|--|--|--|--|--|--|--|--|--|--|--|--|--|--|--|--|--|--|--|--|--|--|--|--|--|--|--|--|--|--|--|--|--|--|--|--|--|--|--|--|--|--|--|--|--|--|--|--|--|--|--|--|--|--|--|--|--|--|--|--|--|--|--|--|--|--|--|--|--|--|--|--|--|--|--|--|--|--|--|--|--|--|--|--|--|--|--|--|--|--|--|--|--|--|--|--|--|--|--|--|--|--|--|--|--|--|--|--|--|--|--|--|--|--|--|--|--|--|--|--|--|--|--|--|--|--|--|--|--|--|--|--|--|--|--|--|--|--|--|--|--|--|--|--|--|--|--|--|--|--|--|--|--|--|--|--|--|--|--|--|--|--|--|--|--|--|--|--|--|--|----|
|-------|--|-------|--|--|--|--|--|--|--|--|--|--|--|--|--|--|--|--|--|--|--|--|--|--|--|--|--|--|--|--|--|--|--|--|--|--|--|--|--|--|--|--|--|--|--|--|--|--|--|--|--|--|--|--|--|--|--|--|--|--|--|--|--|--|--|--|--|--|--|--|--|--|--|--|--|--|--|--|--|--|--|--|--|--|--|--|--|--|--|--|--|--|--|--|--|--|--|--|--|--|--|--|--|--|--|--|--|--|--|--|--|--|--|--|--|--|--|--|--|--|--|--|--|--|--|--|--|--|--|--|--|--|--|--|--|--|--|--|--|--|--|--|--|--|--|--|--|--|--|--|--|--|--|--|--|--|--|--|--|--|--|--|--|--|--|--|--|--|--|--|--|--|--|--|--|--|--|--|--|--|--|--|--|--|--|--|--|--|--|--|--|--|--|--|--|--|--|--|--|--|--|--|--|--|--|--|--|--|--|--|--|--|--|--|--|--|--|--|--|--|--|--|--|--|--|--|--|--|--|--|--|--|--|--|--|--|--|--|--|--|--|--|--|--|--|--|--|--|--|--|--|--|--|--|--|--|--|--|--|--|--|--|--|--|--|--|--|--|--|--|--|--|--|--|--|--|--|--|--|--|--|--|--|--|--|--|--|--|--|--|--|--|--|--|--|--|--|--|--|--|--|--|--|--|--|--|--|--|--|--|--|--|--|--|--|--|--|--|--|--|--|--|--|--|--|--|--|--|--|--|--|--|--|--|--|--|--|--|--|--|--|--|--|--|--|--|--|--|--|--|--|--|--|--|--|--|--|--|--|--|--|--|--|--|--|--|--|--|--|--|--|--|--|--|--|--|--|--|--|--|--|--|--|--|--|--|--|--|--|--|--|--|--|--|--|--|--|--|--|--|--|--|--|--|--|--|--|--|--|--|--|--|--|--|--|--|--|--|--|--|--|--|--|--|--|--|--|--|--|--|--|--|--|--|--|--|--|--|--|--|--|--|--|--|--|--|--|--|--|--|--|--|--|--|--|--|--|--|--|--|--|--|--|--|--|--|--|--|--|--|--|--|--|--|--|--|--|--|--|--|--|--|--|--|--|--|--|--|--|--|--|--|--|--|--|--|--|--|--|--|--|--|--|--|--|--|--|--|--|--|--|--|--|--|--|--|--|--|--|--|--|--|--|--|--|--|--|--|--|--|--|--|--|--|--|--|--|--|--|--|--|--|--|--|--|--|--|--|--|--|--|--|--|--|--|--|--|--|--|--|--|--|--|--|--|--|--|--|--|--|--|--|--|--|--|--|--|--|--|--|--|--|--|--|--|--|--|--|--|--|--|--|--|--|--|--|--|--|--|--|--|--|--|--|--|--|--|--|--|--|--|--|--|--|--|--|--|--|--|--|--|--|--|--|--|--|--|--|--|--|--|--|--|--|--|--|--|--|--|--|--|--|--|--|--|--|--|--|--|--|--|--|--|--|--|--|--|--|--|--|--|--|--|--|--|--|--|--|--|--|--|--|--|--|--|--|--|--|--|--|--|--|--|--|--|--|--|--|--|--|--|--|--|--|--|--|--|--|--|--|--|--|--|--|--|--|--|--|--|--|--|--|--|--|--|--|--|--|--|--|--|--|--|--|--|--|--|--|--|--|--|--|--|--|--|--|--|--|--|--|--|--|--|--|--|--|--|--|--|--|--|--|--|--|--|--|--|--|--|--|--|--|--|--|--|--|--|--|--|--|--|--|--|--|--|--|--|--|--|--|--|--|--|--|--|--|--|--|--|--|--|--|--|--|--|--|--|--|--|--|--|--|--|--|--|--|--|--|--|--|--|--|--|--|--|--|--|--|--|--|--|--|--|--|--|--|--|--|--|--|--|--|--|--|--|--|--|--|--|--|--|--|--|--|--|--|--|--|--|--|--|--|--|--|--|--|--|--|--|--|--|--|--|--|--|--|--|--|--|--|--|--|--|--|--|--|--|--|--|--|--|--|--|--|--|--|--|--|--|--|--|--|--|--|--|--|--|--|--|--|--|--|--|--|--|--|--|--|--|--|--|--|--|--|--|--|--|--|--|--|--|--|--|--|--|--|--|--|--|--|--|--|--|--|--|--|--|--|--|--|--|--|--|--|--|--|--|--|--|--|--|--|--|--|--|--|--|--|--|--|--|--|--|--|--|--|--|--|--|--|--|--|--|--|--|--|--|--|--|--|--|--|--|--|--|--|--|--|--|--|--|--|--|--|--|--|--|--|--|--|--|--|--|--|--|--|--|--|--|--|--|--|--|--|--|--|--|--|--|--|--|--|--|--|--|--|--|--|--|--|--|--|--|--|--|--|--|--|--|--|--|--|--|--|--|--|--|--|--|--|--|--|--|--|--|--|--|--|--|--|--|--|--|--|--|--|--|--|--|--|--|--|--|--|--|--|--|--|--|--|--|--|--|--|--|--|--|--|--|--|--|--|--|--|--|--|--|--|--|--|--|--|--|--|--|--|--|--|--|--|--|--|--|--|--|--|--|--|--|--|--|--|--|--|--|--|--|--|--|--|--|--|--|--|--|--|--|--|--|--|--|--|--|--|--|--|--|--|--|--|--|--|--|--|--|--|--|--|--|--|--|--|--|--|--|--|--|--|--|--|--|--|--|--|--|--|--|--|--|--|--|--|--|--|--|--|--|--|--|--|--|--|--|--|--|--|--|--|--|--|--|--|--|--|--|--|--|--|--|--|--|--|--|--|--|--|--|--|--|--|--|--|--|--|--|--|--|--|--|--|--|--|--|--|--|--|--|--|--|--|--|--|--|--|--|--|--|--|--|--|--|--|--|--|--|--|--|--|--|--|--|--|--|--|--|--|--|--|--|--|--|--|--|--|--|--|--|--|--|--|--|--|--|--|--|--|--|--|--|--|--|--|--|--|--|--|--|--|--|--|--|--|--|--|--|--|--|--|--|--|--|--|--|--|--|--|--|--|--|--|--|--|--|--|--|--|--|--|--|--|--|--|--|--|--|--|--|--|--|--|--|--|--|--|--|--|--|--|--|--|--|--|--|--|--|--|--|--|--|--|--|--|--|--|--|--|--|--|----|

## Supplementary material 3 – S3

[illegible][illegible][illegible][illegible]

| HP | Term name                                   | Term ID   | Padj                   | $-\log_{10}(p\text{-value})$ | HP | Term name | Term ID | Padj | $-\log_{10}(p\text{-value})$ |
|----|---------------------------------------------|-----------|------------------------|------------------------------|----|-----------|---------|------|------------------------------|
|    | Ganglioneuroma                              | HP0003005 | $6.204 \times 10^{-3}$ |                              |    |           |         |      |                              |
|    | Ganglioneuroblastoma                        | HP0006747 | $6.204 \times 10^{-3}$ |                              |    |           |         |      |                              |
|    | Neuropathic of the autonomic nervous system | HP0030450 | $6.204 \times 10^{-3}$ |                              |    |           |         |      |                              |

## Enrichment analyzes – downregulated genes in the prefrontal cortices of one-month-old females that were prenatally exposed to the triclocarban

### Curated reactome

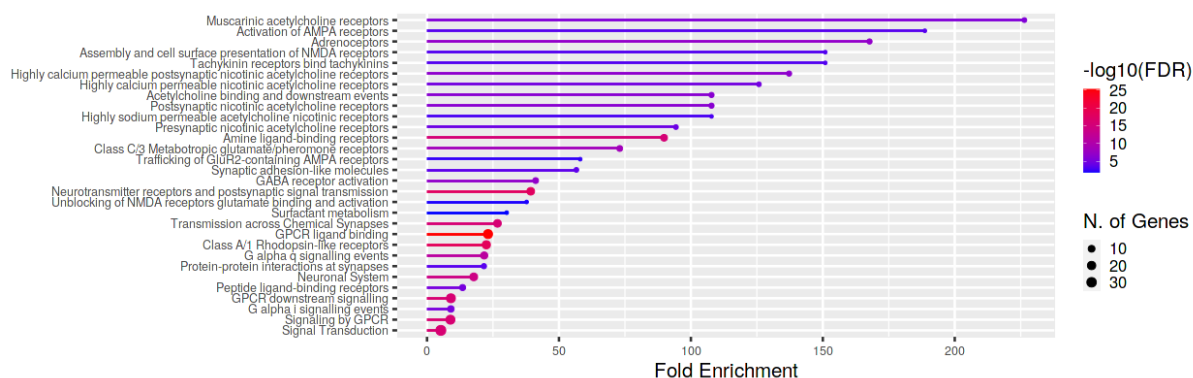

### GO Cellular Component

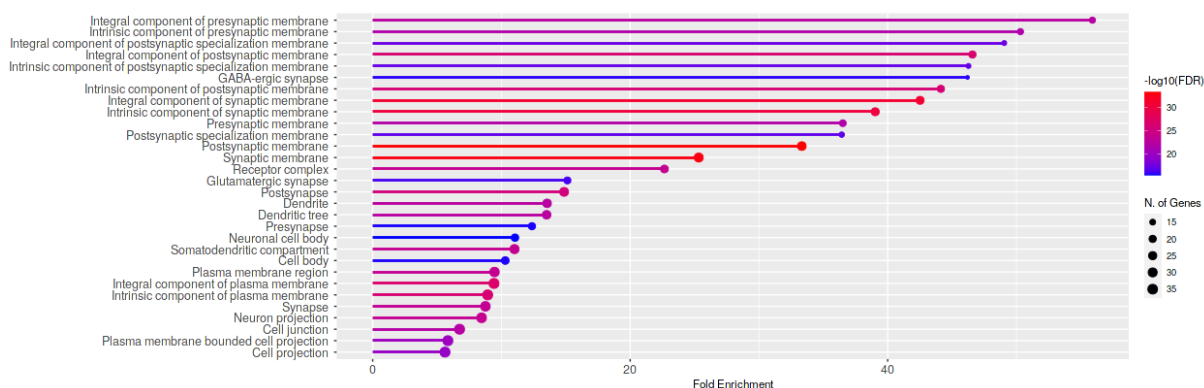

### GO Molecular Function

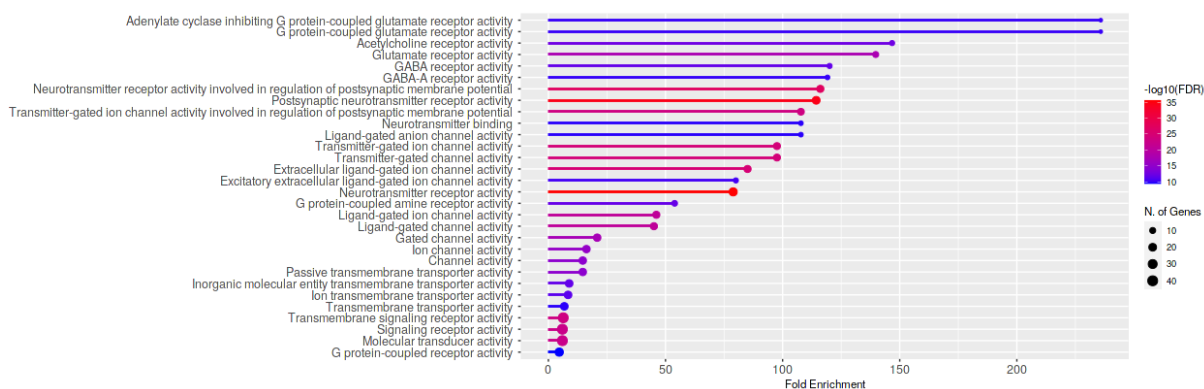

## KEGG

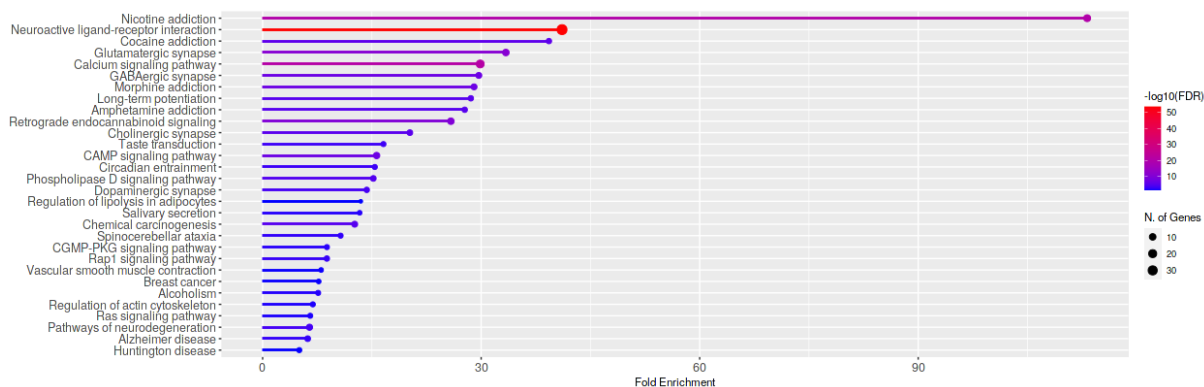

## KEGG pathway – Neuroactive ligand-receptor interaction

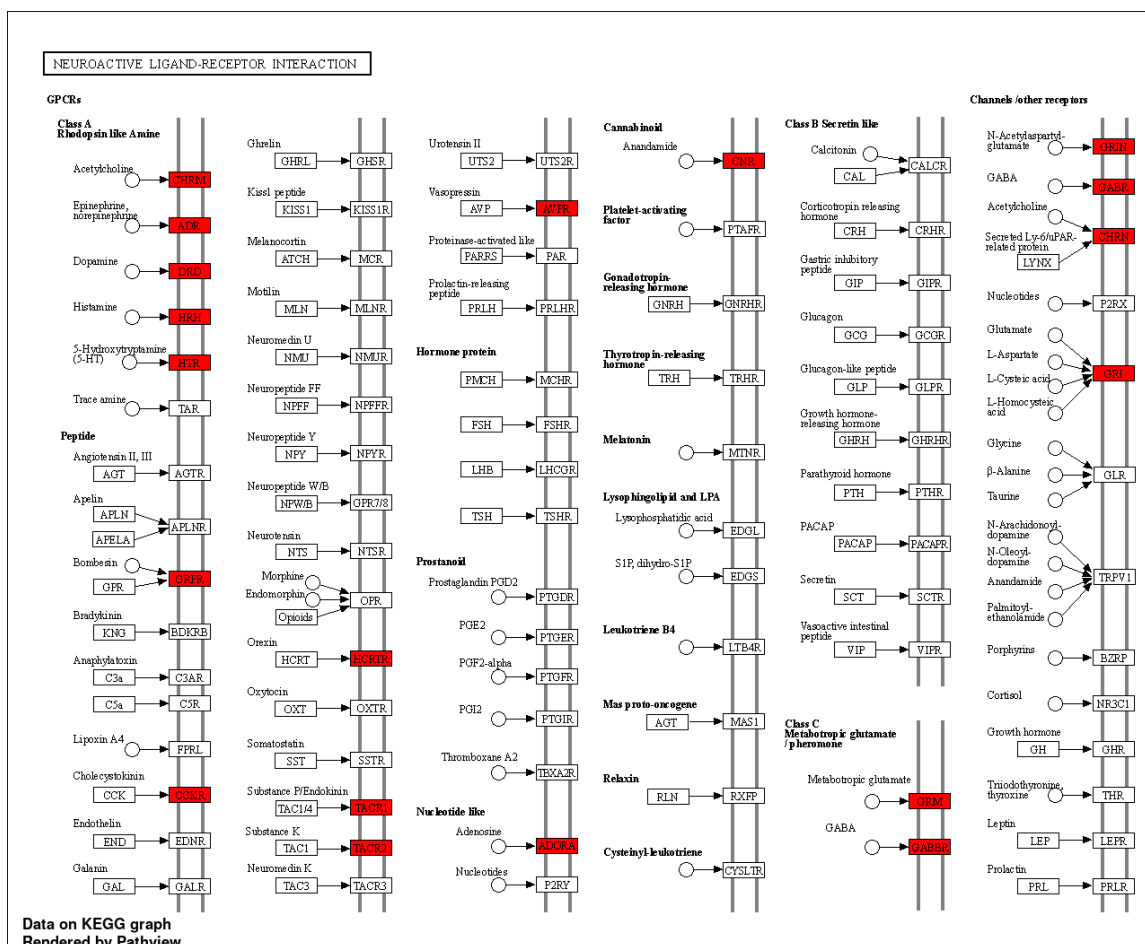

# KEGG pathway – Glutaminergic synapse

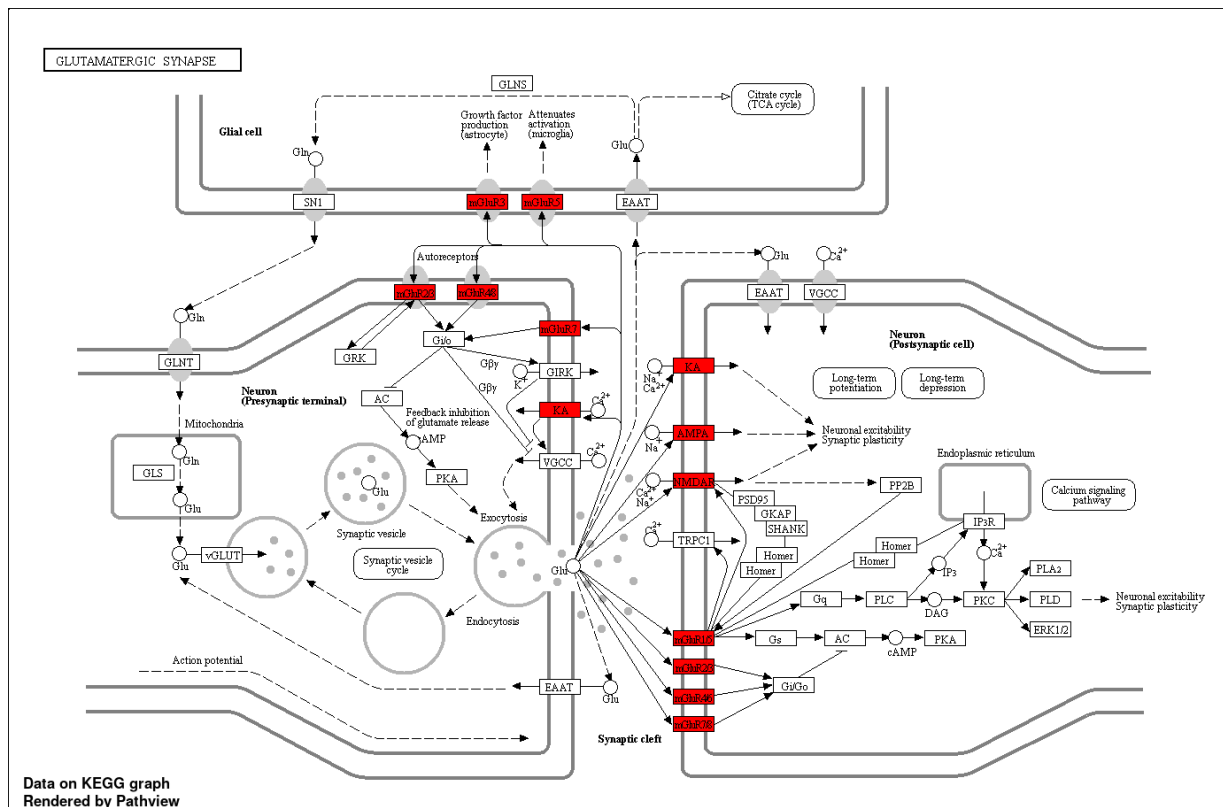

## g:Profiler - g:GOST

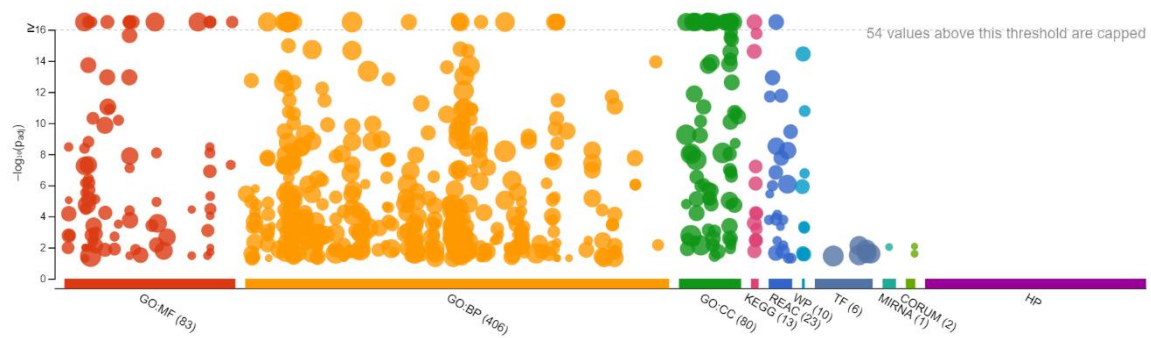

## Supplementary material 4 – S4

[illegible]



## Supplementary material 4 – S4

[illegible]



## Supplementary material 4 – S4

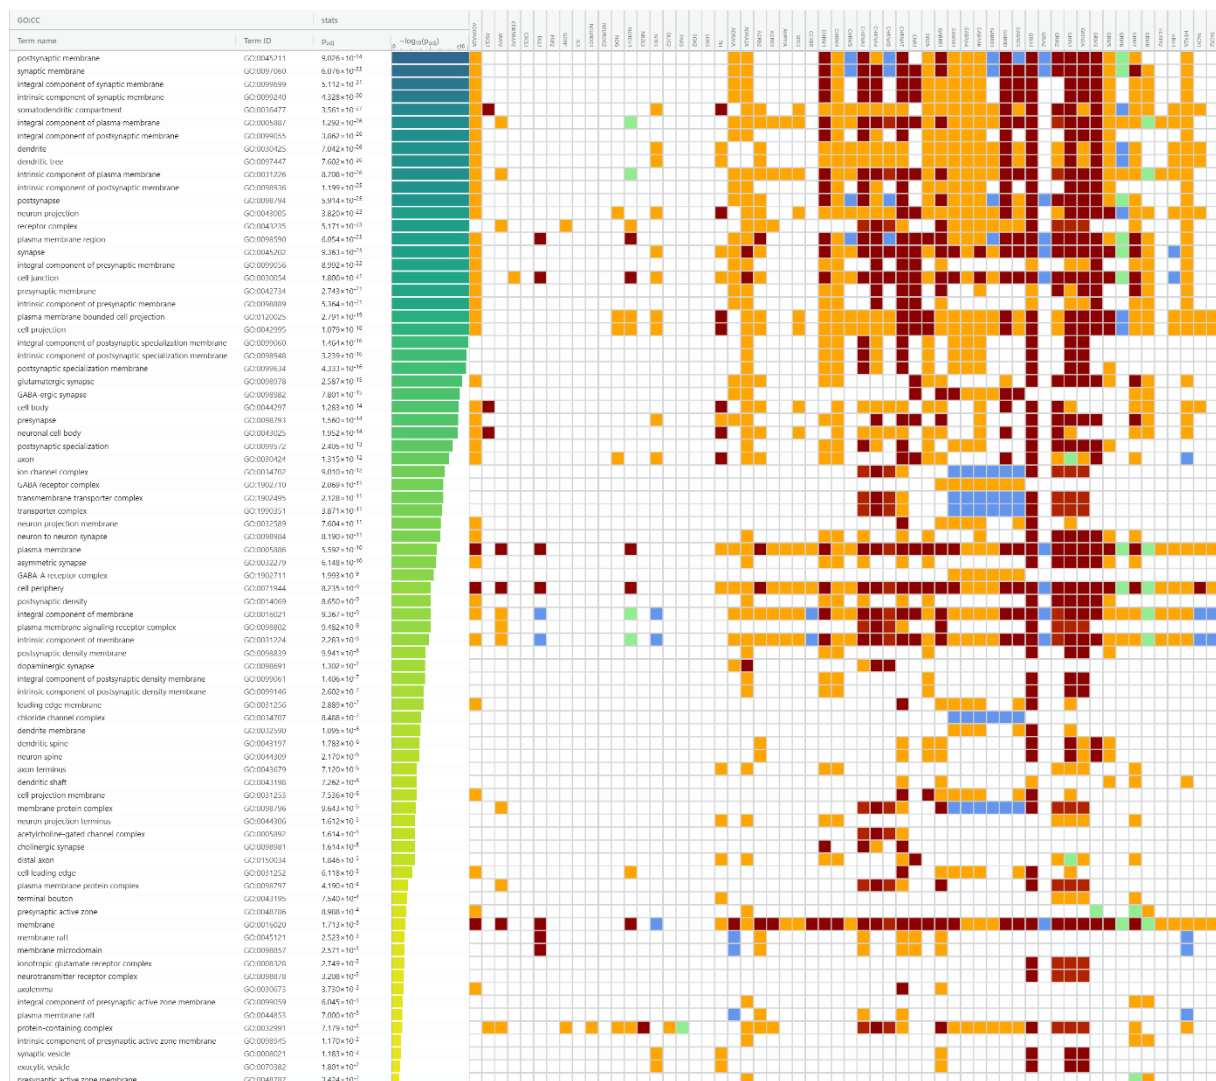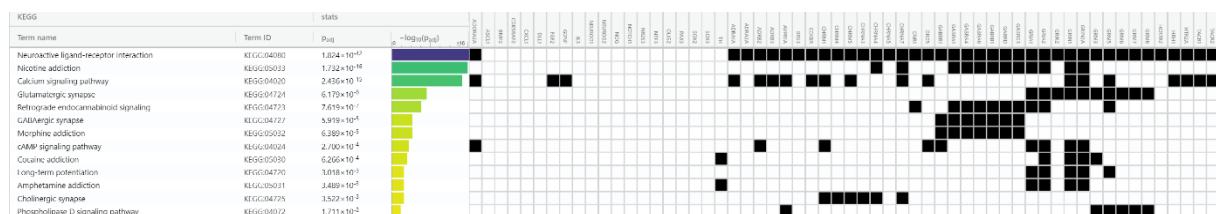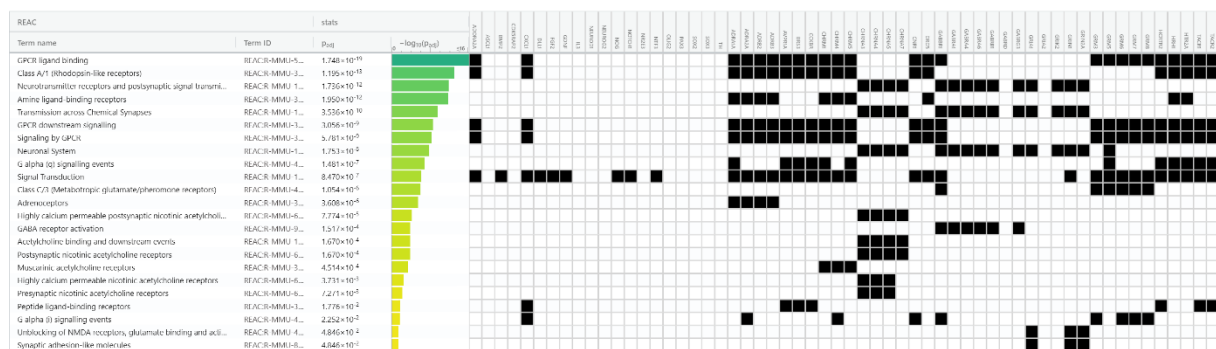

Supplementary material 4 – S4

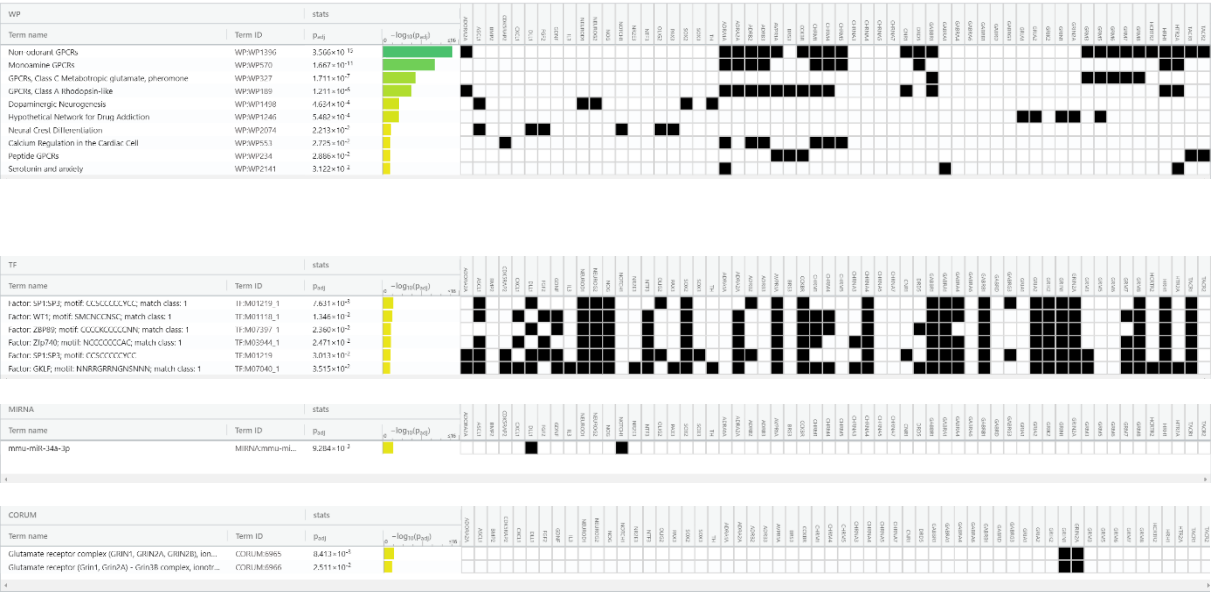

**Enrichment analyzes – upregulated genes in the prefrontal cortices of one-month-old males that were prenatally exposed to the triclocarban****Curated reactome**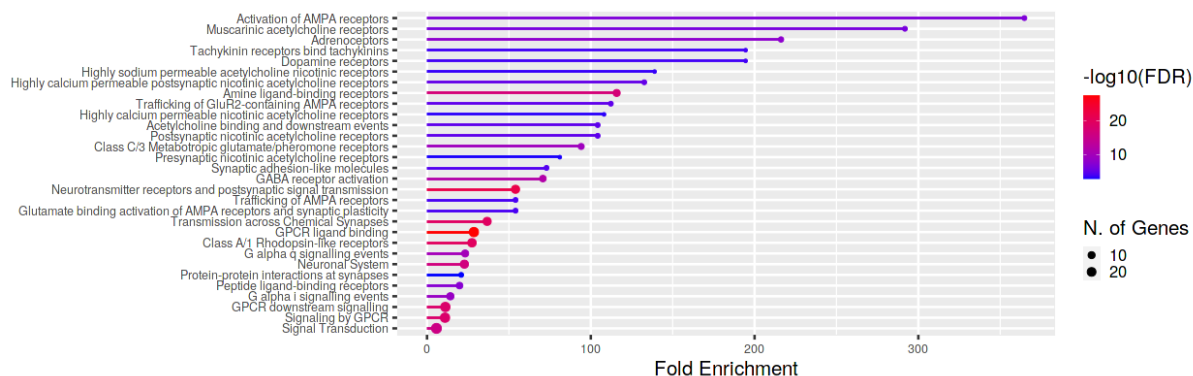**GO Cellular Component**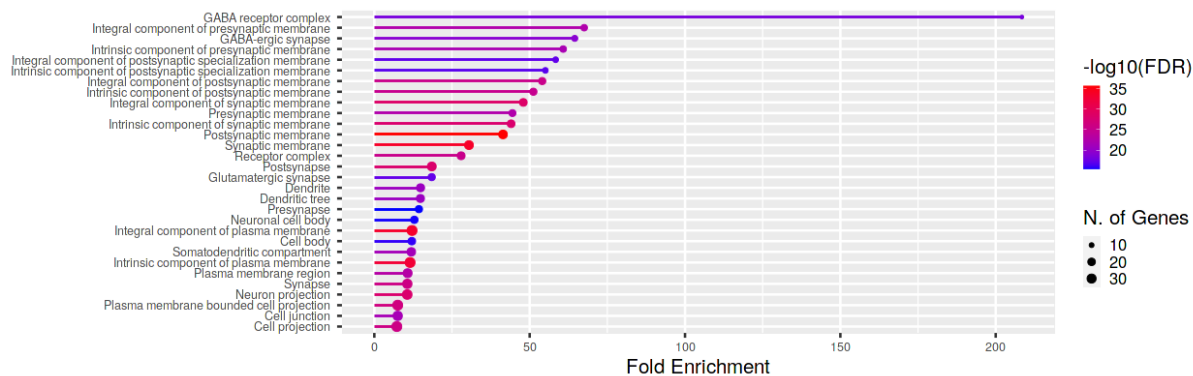**GO Molecular Function**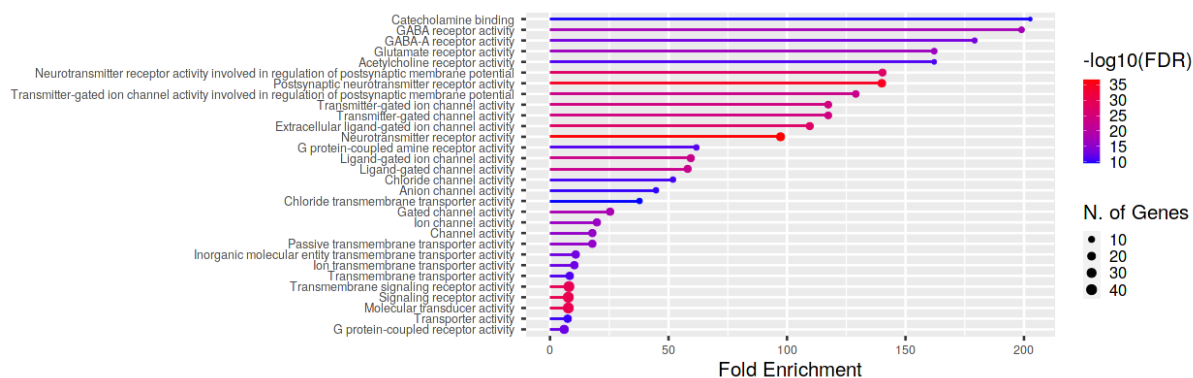

KEGG

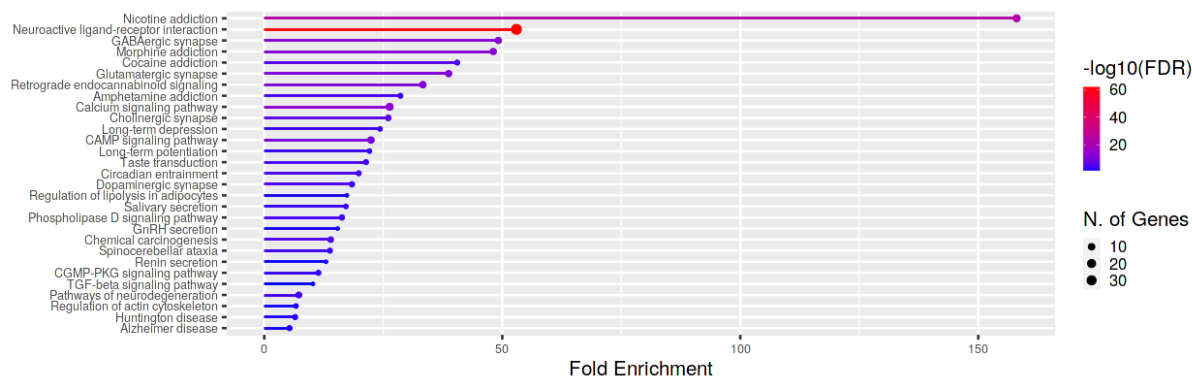

KEGG pathway – Neuroactive ligand-receptor interaction

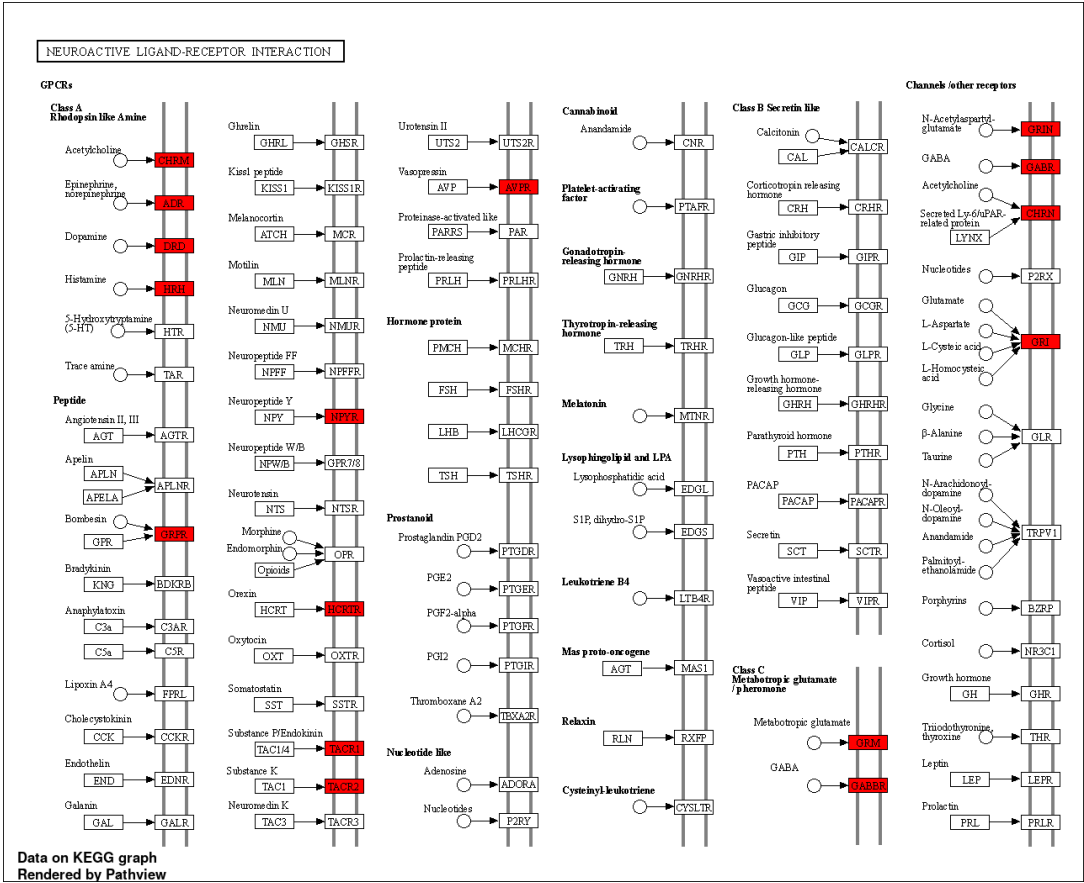

### KEGG pathway – Glutaminergic synapse

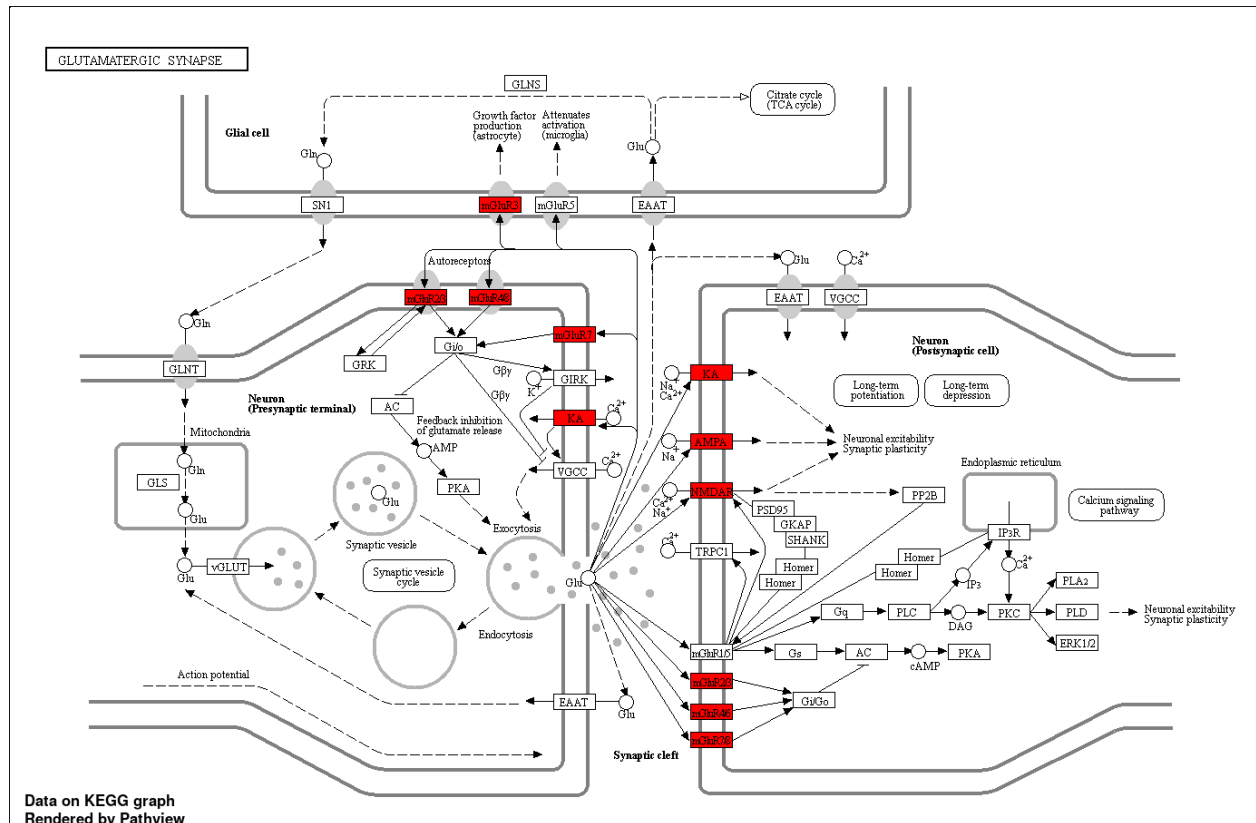

### KEGG pathway – GABAergic synapse

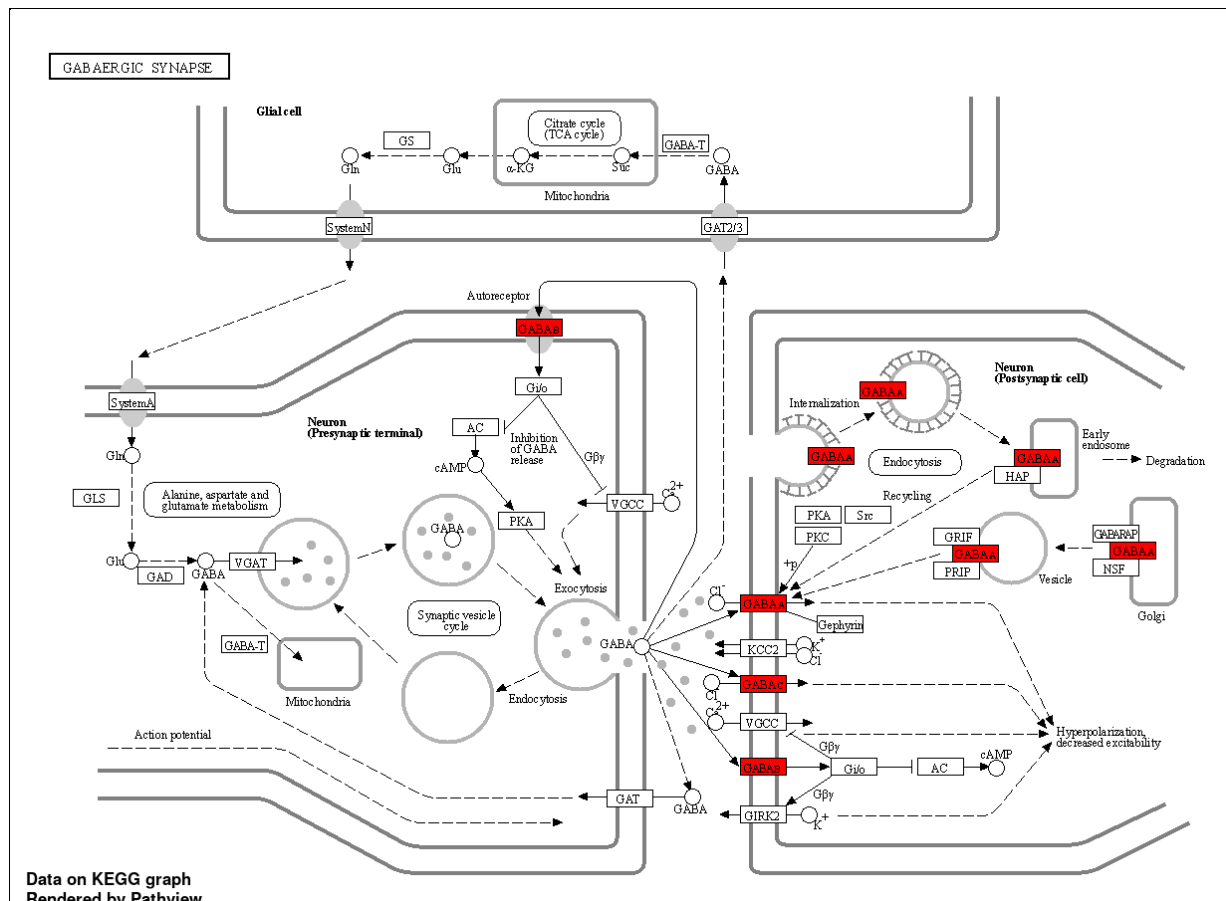

## g:Profiler - g:GOST

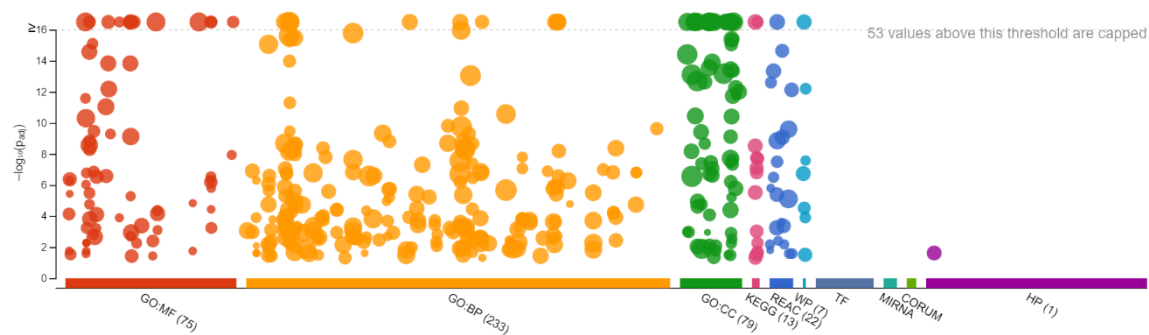

| GO:MF |  | stats |  |  |  |  |  |  |  |  |  |  |  |  |  |  |  |  |  |  |  |  |  |  |  |  |  |  |  |  |  |  |  |  |  |  |  |  |  |  |  |  |  |  |  |  |  |  |  |  |  |  |  |  |  |  |  |  |  |  |  |  |  |  |  |  |  |  |  |  |  |  |  |  |  |  |  |  |  |  |  |  |  |  |  |  |  |  |  |  |  |  |  |  |  |  |  |  |  |  |  |  |  |  |  |  |  |  |  |  |  |  |  |  |  |  |  |  |  |  |  |  |  |  |  |  |  |  |  |  |  |  |  |  |  |  |  |  |  |  |  |  |  |  |  |  |  |  |  |  |  |  |  |  |  |  |  |  |  |  |  |  |  |  |  |  |  |  |  |  |  |  |  |  |  |  |  |  |  |  |  |  |  |  |  |  |  |  |  |  |  |  |  |  |  |  |  |  |  |  |  |  |  |  |  |  |  |  |  |  |  |  |  |  |  |  |  |  |  |  |  |  |  |  |  |  |  |  |  |  |  |  |  |  |  |  |  |  |  |  |  |  |  |  |  |  |  |  |  |  |  |  |  |  |  |  |  |  |  |  |  |  |  |  |  |  |  |  |  |  |  |  |  |  |  |  |  |  |  |  |  |  |  |  |  |  |  |  |  |  |  |  |  |  |  |  |  |  |  |  |  |  |  |  |  |  |  |  |  |  |  |  |  |  |  |  |  |  |  |  |  |  |  |  |  |  |  |  |  |  |  |  |  |  |  |  |  |  |  |  |  |  |  |  |  |  |  |  |  |  |  |  |  |  |  |  |  |  |  |  |  |  |  |  |  |  |  |  |  |  |  |  |  |  |  |  |  |  |  |  |  |  |  |  |  |  |  |  |  |  |  |  |  |  |  |  |  |  |  |  |  |  |  |  |  |  |  |  |  |  |  |  |  |  |  |  |  |  |  |  |  |  |  |  |  |  |  |  |  |  |  |  |  |  |  |  |  |  |  |  |  |  |  |  |  |  |  |  |  |  |  |  |  |  |  |  |  |  |  |  |  |  |  |  |  |  |  |  |  |  |  |  |  |  |  |  |  |  |  |  |  |  |  |  |  |  |  |  |  |  |  |  |  |  |  |  |  |  |  |  |  |  |  |  |  |  |  |  |  |  |  |  |  |  |  |  |  |  |  |  |  |  |  |  |  |  |  |  |  |  |  |  |  |  |  |  |  |  |  |  |  |  |  |  |  |  |  |  |  |  |  |  |  |  |  |  |  |  |  |  |  |  |  |  |  |  |  |  |  |  |  |  |  |  |  |  |  |  |  |  |  |  |  |  |  |  |  |  |  |  |  |  |  |  |  |  |  |  |  |  |  |  |  |  |  |  |  |  |  |  |  |  |  |  |  |  |  |  |  |  |  |  |  |  |  |  |  |  |  |  |  |  |  |  |  |  |  |  |  |  |  |  |  |  |  |  |  |  |  |  |  |  |  |  |  |  |  |  |  |  |  |  |  |  |  |  |  |  |  |  |  |  |  |  |  |  |  |  |  |  |  |  |  |  |  |  |  |  |  |  |  |  |  |  |  |  |  |  |  |  |  |  |  |  |  |  |  |  |  |  |  |  |  |  |  |  |  |  |  |  |  |  |  |  |  |  |  |  |  |  |  |  |  |  |  |  |  |  |  |  |  |  |  |  |  |  |  |  |  |  |  |  |  |  |  |  |  |  |  |  |  |  |  |  |  |  |  |  |  |  |  |  |  |  |  |  |  |  |  |  |  |  |  |  |  |  |  |  |  |  |  |  |  |  |  |  |  |  |  |  |  |  |  |  |  |  |  |  |  |  |  |  |  |  |  |  |  |  |  |  |  |  |  |  |  |  |  |  |  |  |  |  |  |  |  |  |  |  |  |  |  |  |  |  |  |  |  |  |  |  |  |  |  |  |  |  |  |  |  |  |  |  |  |  |  |  |  |  |  |  |  |  |  |  |  |  |  |  |  |  |  |  |  |  |  |  |  |  |  |  |  |  |  |  |  |  |  |  |  |  |  |  |  |  |  |  |  |  |  |  |  |  |  |  |  |  |  |  |  |  |  |  |  |  |  |  |  |  |  |  |  |  |  |  |  |  |  |  |  |  |  |  |  |  |  |  |  |  |  |  |  |  |  |  |  |  |  |  |  |  |  |  |  |  |  |  |  |  |  |  |  |  |  |  |  |  |  |  |  |  |  |  |  |  |  |  |  |  |  |  |  |  |  |  |  |  |  |  |  |  |  |  |  |  |  |  |  |  |  |  |  |  |  |  |  |  |  |  |  |  |  |  |  |  |  |  |  |  |  |  |  |  |  |  |  |  |  |  |  |  |  |  |  |  |  |  |  |  |  |  |  |  |  |  |  |  |  |  |  |  |  |  |  |  |  |  |  |  |  |  |  |  |  |  |  |  |  |  |  |  |  |  |  |  |  |  |  |  |  |  |  |  |  |  |  |  |  |  |  |  |  |  |  |  |  |  |  |  |  |  |  |  |  |  |  |  |  |  |  |  |  |  |  |  |  |  |  |  |  |  |  |  |  |  |  |  |  |  |  |  |  |  |  |  |  |  |  |  |  |  |  |  |  |  |  |  |  |  |  |  |  |  |  |  |  |  |  |  |  |  |  |  |  |  |  |  |  |  |  |  |  |  |  |  |  |  |  |  |  |  |  |  |  |  |  |  |  |  |  |  |  |  |  |  |  |  |  |  |  |  |  |  |  |  |  |  |  |  |  |  |  |  |  |  |  |  |  |  |  |  |  |  |  |  |  |  |  |  |  |  |  |  |  |  |  |  |  |  |  |  |  |  |  |  |  |  |  |  |  |  |  |  |  |  |  |  |  |  |  |  |  |  |  |  |  |  |  |  |  |  |  |  |  |  |  |  |  |  |  |  |  |  |  |  |  |  |  |  |  |  |  |  |  |  |  |  |  |  |  |  |  |  |  |  |  |  |  |  |  |  |  |  |  |  |  |  |  |  |  |  |  |  |  |  |  |  |  |  |  |  |  |  |  |  |  |  |  |  |  |  |  |  |  |  |  |  |  |  |  |  |  |  |  |  |  |  |  |  |  |  |  |  |  |  |  |  |  |  |  |  |  |  |  |  |  |  |  |  |  |  |  |  |  |  |  |  |  |  |  |  |  |  |  |  |  |  |  |  |  |  |  |  |  |  |  |  |  |  |  |  |  |  |  |  |  |  |  |  |  |  |  |  |  |  |  |  |  |  |  |  |  |  |
|-------|--|-------|--|--|--|--|--|--|--|--|--|--|--|--|--|--|--|--|--|--|--|--|--|--|--|--|--|--|--|--|--|--|--|--|--|--|--|--|--|--|--|--|--|--|--|--|--|--|--|--|--|--|--|--|--|--|--|--|--|--|--|--|--|--|--|--|--|--|--|--|--|--|--|--|--|--|--|--|--|--|--|--|--|--|--|--|--|--|--|--|--|--|--|--|--|--|--|--|--|--|--|--|--|--|--|--|--|--|--|--|--|--|--|--|--|--|--|--|--|--|--|--|--|--|--|--|--|--|--|--|--|--|--|--|--|--|--|--|--|--|--|--|--|--|--|--|--|--|--|--|--|--|--|--|--|--|--|--|--|--|--|--|--|--|--|--|--|--|--|--|--|--|--|--|--|--|--|--|--|--|--|--|--|--|--|--|--|--|--|--|--|--|--|--|--|--|--|--|--|--|--|--|--|--|--|--|--|--|--|--|--|--|--|--|--|--|--|--|--|--|--|--|--|--|--|--|--|--|--|--|--|--|--|--|--|--|--|--|--|--|--|--|--|--|--|--|--|--|--|--|--|--|--|--|--|--|--|--|--|--|--|--|--|--|--|--|--|--|--|--|--|--|--|--|--|--|--|--|--|--|--|--|--|--|--|--|--|--|--|--|--|--|--|--|--|--|--|--|--|--|--|--|--|--|--|--|--|--|--|--|--|--|--|--|--|--|--|--|--|--|--|--|--|--|--|--|--|--|--|--|--|--|--|--|--|--|--|--|--|--|--|--|--|--|--|--|--|--|--|--|--|--|--|--|--|--|--|--|--|--|--|--|--|--|--|--|--|--|--|--|--|--|--|--|--|--|--|--|--|--|--|--|--|--|--|--|--|--|--|--|--|--|--|--|--|--|--|--|--|--|--|--|--|--|--|--|--|--|--|--|--|--|--|--|--|--|--|--|--|--|--|--|--|--|--|--|--|--|--|--|--|--|--|--|--|--|--|--|--|--|--|--|--|--|--|--|--|--|--|--|--|--|--|--|--|--|--|--|--|--|--|--|--|--|--|--|--|--|--|--|--|--|--|--|--|--|--|--|--|--|--|--|--|--|--|--|--|--|--|--|--|--|--|--|--|--|--|--|--|--|--|--|--|--|--|--|--|--|--|--|--|--|--|--|--|--|--|--|--|--|--|--|--|--|--|--|--|--|--|--|--|--|--|--|--|--|--|--|--|--|--|--|--|--|--|--|--|--|--|--|--|--|--|--|--|--|--|--|--|--|--|--|--|--|--|--|--|--|--|--|--|--|--|--|--|--|--|--|--|--|--|--|--|--|--|--|--|--|--|--|--|--|--|--|--|--|--|--|--|--|--|--|--|--|--|--|--|--|--|--|--|--|--|--|--|--|--|--|--|--|--|--|--|--|--|--|--|--|--|--|--|--|--|--|--|--|--|--|--|--|--|--|--|--|--|--|--|--|--|--|--|--|--|--|--|--|--|--|--|--|--|--|--|--|--|--|--|--|--|--|--|--|--|--|--|--|--|--|--|--|--|--|--|--|--|--|--|--|--|--|--|--|--|--|--|--|--|--|--|--|--|--|--|--|--|--|--|--|--|--|--|--|--|--|--|--|--|--|--|--|--|--|--|--|--|--|--|--|--|--|--|--|--|--|--|--|--|--|--|--|--|--|--|--|--|--|--|--|--|--|--|--|--|--|--|--|--|--|--|--|--|--|--|--|--|--|--|--|--|--|--|--|--|--|--|--|--|--|--|--|--|--|--|--|--|--|--|--|--|--|--|--|--|--|--|--|--|--|--|--|--|--|--|--|--|--|--|--|--|--|--|--|--|--|--|--|--|--|--|--|--|--|--|--|--|--|--|--|--|--|--|--|--|--|--|--|--|--|--|--|--|--|--|--|--|--|--|--|--|--|--|--|--|--|--|--|--|--|--|--|--|--|--|--|--|--|--|--|--|--|--|--|--|--|--|--|--|--|--|--|--|--|--|--|--|--|--|--|--|--|--|--|--|--|--|--|--|--|--|--|--|--|--|--|--|--|--|--|--|--|--|--|--|--|--|--|--|--|--|--|--|--|--|--|--|--|--|--|--|--|--|--|--|--|--|--|--|--|--|--|--|--|--|--|--|--|--|--|--|--|--|--|--|--|--|--|--|--|--|--|--|--|--|--|--|--|--|--|--|--|--|--|--|--|--|--|--|--|--|--|--|--|--|--|--|--|--|--|--|--|--|--|--|--|--|--|--|--|--|--|--|--|--|--|--|--|--|--|--|--|--|--|--|--|--|--|--|--|--|--|--|--|--|--|--|--|--|--|--|--|--|--|--|--|--|--|--|--|--|--|--|--|--|--|--|--|--|--|--|--|--|--|--|--|--|--|--|--|--|--|--|--|--|--|--|--|--|--|--|--|--|--|--|--|--|--|--|--|--|--|--|--|--|--|--|--|--|--|--|--|--|--|--|--|--|--|--|--|--|--|--|--|--|--|--|--|--|--|--|--|--|--|--|--|--|--|--|--|--|--|--|--|--|--|--|--|--|--|--|--|--|--|--|--|--|--|--|--|--|--|--|--|--|--|--|--|--|--|--|--|--|--|--|--|--|--|--|--|--|--|--|--|--|--|--|--|--|--|--|--|--|--|--|--|--|--|--|--|--|--|--|--|--|--|--|--|--|--|--|--|--|--|--|--|--|--|--|--|--|--|--|--|--|--|--|--|--|--|--|--|--|--|--|--|--|--|--|--|--|--|--|--|--|--|--|--|--|--|--|--|--|--|--|--|--|--|--|--|--|--|--|--|--|--|--|--|--|--|--|--|--|--|--|--|--|--|--|--|--|--|--|--|--|--|--|--|--|--|--|--|--|--|--|--|--|--|--|--|--|--|--|--|--|--|--|--|--|--|--|--|--|--|--|--|--|--|--|--|--|--|--|--|--|--|--|--|--|--|--|--|--|--|--|--|--|--|--|--|--|--|--|--|--|--|--|--|--|--|--|--|--|--|--|--|--|--|--|--|--|--|--|--|--|--|--|--|--|--|--|--|--|--|--|--|--|--|--|--|--|--|--|--|--|--|--|--|--|--|--|--|--|--|--|--|--|--|--|--|--|--|--|--|--|--|--|--|--|--|--|--|--|--|--|--|--|--|--|--|--|--|--|--|--|--|--|--|--|--|--|--|--|--|--|--|--|--|--|--|--|--|--|--|--|--|--|--|--|--|--|--|--|--|--|--|--|--|--|--|--|--|--|--|
|-------|--|-------|--|--|--|--|--|--|--|--|--|--|--|--|--|--|--|--|--|--|--|--|--|--|--|--|--|--|--|--|--|--|--|--|--|--|--|--|--|--|--|--|--|--|--|--|--|--|--|--|--|--|--|--|--|--|--|--|--|--|--|--|--|--|--|--|--|--|--|--|--|--|--|--|--|--|--|--|--|--|--|--|--|--|--|--|--|--|--|--|--|--|--|--|--|--|--|--|--|--|--|--|--|--|--|--|--|--|--|--|--|--|--|--|--|--|--|--|--|--|--|--|--|--|--|--|--|--|--|--|--|--|--|--|--|--|--|--|--|--|--|--|--|--|--|--|--|--|--|--|--|--|--|--|--|--|--|--|--|--|--|--|--|--|--|--|--|--|--|--|--|--|--|--|--|--|--|--|--|--|--|--|--|--|--|--|--|--|--|--|--|--|--|--|--|--|--|--|--|--|--|--|--|--|--|--|--|--|--|--|--|--|--|--|--|--|--|--|--|--|--|--|--|--|--|--|--|--|--|--|--|--|--|--|--|--|--|--|--|--|--|--|--|--|--|--|--|--|--|--|--|--|--|--|--|--|--|--|--|--|--|--|--|--|--|--|--|--|--|--|--|--|--|--|--|--|--|--|--|--|--|--|--|--|--|--|--|--|--|--|--|--|--|--|--|--|--|--|--|--|--|--|--|--|--|--|--|--|--|--|--|--|--|--|--|--|--|--|--|--|--|--|--|--|--|--|--|--|--|--|--|--|--|--|--|--|--|--|--|--|--|--|--|--|--|--|--|--|--|--|--|--|--|--|--|--|--|--|--|--|--|--|--|--|--|--|--|--|--|--|--|--|--|--|--|--|--|--|--|--|--|--|--|--|--|--|--|--|--|--|--|--|--|--|--|--|--|--|--|--|--|--|--|--|--|--|--|--|--|--|--|--|--|--|--|--|--|--|--|--|--|--|--|--|--|--|--|--|--|--|--|--|--|--|--|--|--|--|--|--|--|--|--|--|--|--|--|--|--|--|--|--|--|--|--|--|--|--|--|--|--|--|--|--|--|--|--|--|--|--|--|--|--|--|--|--|--|--|--|--|--|--|--|--|--|--|--|--|--|--|--|--|--|--|--|--|--|--|--|--|--|--|--|--|--|--|--|--|--|--|--|--|--|--|--|--|--|--|--|--|--|--|--|--|--|--|--|--|--|--|--|--|--|--|--|--|--|--|--|--|--|--|--|--|--|--|--|--|--|--|--|--|--|--|--|--|--|--|--|--|--|--|--|--|--|--|--|--|--|--|--|--|--|--|--|--|--|--|--|--|--|--|--|--|--|--|--|--|--|--|--|--|--|--|--|--|--|--|--|--|--|--|--|--|--|--|--|--|--|--|--|--|--|--|--|--|--|--|--|--|--|--|--|--|--|--|--|--|--|--|--|--|--|--|--|--|--|--|--|--|--|--|--|--|--|--|--|--|--|--|--|--|--|--|--|--|--|--|--|--|--|--|--|--|--|--|--|--|--|--|--|--|--|--|--|--|--|--|--|--|--|--|--|--|--|--|--|--|--|--|--|--|--|--|--|--|--|--|--|--|--|--|--|--|--|--|--|--|--|--|--|--|--|--|--|--|--|--|--|--|--|--|--|--|--|--|--|--|--|--|--|--|--|--|--|--|--|--|--|--|--|--|--|--|--|--|--|--|--|--|--|--|--|--|--|--|--|--|--|--|--|--|--|--|--|--|--|--|--|--|--|--|--|--|--|--|--|--|--|--|--|--|--|--|--|--|--|--|--|--|--|--|--|--|--|--|--|--|--|--|--|--|--|--|--|--|--|--|--|--|--|--|--|--|--|--|--|--|--|--|--|--|--|--|--|--|--|--|--|--|--|--|--|--|--|--|--|--|--|--|--|--|--|--|--|--|--|--|--|--|--|--|--|--|--|--|--|--|--|--|--|--|--|--|--|--|--|--|--|--|--|--|--|--|--|--|--|--|--|--|--|--|--|--|--|--|--|--|--|--|--|--|--|--|--|--|--|--|--|--|--|--|--|--|--|--|--|--|--|--|--|--|--|--|--|--|--|--|--|--|--|--|--|--|--|--|--|--|--|--|--|--|--|--|--|--|--|--|--|--|--|--|--|--|--|--|--|--|--|--|--|--|--|--|--|--|--|--|--|--|--|--|--|--|--|--|--|--|--|--|--|--|--|--|--|--|--|--|--|--|--|--|--|--|--|--|--|--|--|--|--|--|--|--|--|--|--|--|--|--|--|--|--|--|--|--|--|--|--|--|--|--|--|--|--|--|--|--|--|--|--|--|--|--|--|--|--|--|--|--|--|--|--|--|--|--|--|--|--|--|--|--|--|--|--|--|--|--|--|--|--|--|--|--|--|--|--|--|--|--|--|--|--|--|--|--|--|--|--|--|--|--|--|--|--|--|--|--|--|--|--|--|--|--|--|--|--|--|--|--|--|--|--|--|--|--|--|--|--|--|--|--|--|--|--|--|--|--|--|--|--|--|--|--|--|--|--|--|--|--|--|--|--|--|--|--|--|--|--|--|--|--|--|--|--|--|--|--|--|--|--|--|--|--|--|--|--|--|--|--|--|--|--|--|--|--|--|--|--|--|--|--|--|--|--|--|--|--|--|--|--|--|--|--|--|--|--|--|--|--|--|--|--|--|--|--|--|--|--|--|--|--|--|--|--|--|--|--|--|--|--|--|--|--|--|--|--|--|--|--|--|--|--|--|--|--|--|--|--|--|--|--|--|--|--|--|--|--|--|--|--|--|--|--|--|--|--|--|--|--|--|--|--|--|--|--|--|--|--|--|--|--|--|--|--|--|--|--|--|--|--|--|--|--|--|--|--|--|--|--|--|--|--|--|--|--|--|--|--|--|--|--|--|--|--|--|--|--|--|--|--|--|--|--|--|--|--|--|--|--|--|--|--|--|--|--|--|--|--|--|--|--|--|--|--|--|--|--|--|--|--|--|--|--|--|--|--|--|--|--|--|--|--|--|--|--|--|--|--|--|--|--|--|--|--|--|--|--|--|--|--|--|--|--|--|--|--|--|--|--|--|--|--|--|--|--|--|--|--|--|--|--|--|--|--|--|--|--|--|--|--|--|--|--|--|--|--|--|--|--|--|--|--|--|--|--|--|--|--|--|--|--|--|--|--|--|--|--|--|--|--|--|--|--|--|--|--|--|--|--|--|--|--|--|--|--|--|--|--|--|--|--|--|--|--|--|--|--|--|--|--|--|

## Supplementary material 5 – S5

| GO BP |  | stats |  |  |  |  |  |  |  |  |  |  |  |  |  |  |  |  |  |  |  |  |  |  |  |  |  |  |  |  |  |  |  |  |  |  |  |  |  |  |  |  |  |  |  |  |  |  |  |  |  |  |  |  |  |  |  |  |  |  |  |  |  |  |  |  |  |  |  |  |  |  |  |  |  |  |  |  |  |  |  |  |  |  |  |  |  |  |  |  |  |  |  |  |  |  |  |  |  |  |  |  |  |  |  |  |  |  |  |  |  |  |  |  |  |  |  |  |  |  |  |  |  |  |  |  |  |  |  |  |  |  |  |  |  |  |  |  |  |  |  |  |  |  |  |  |  |  |  |  |  |  |  |  |  |  |  |  |  |  |  |  |  |  |  |  |  |  |  |  |  |  |  |  |  |  |  |  |  |  |  |  |  |  |  |  |  |  |  |  |  |  |  |  |  |  |  |  |  |  |  |  |  |  |  |  |  |  |  |  |  |  |  |  |  |  |  |  |  |  |  |  |  |  |  |  |  |  |  |  |  |  |  |  |  |  |  |  |  |  |  |  |  |  |  |  |  |  |  |  |  |  |  |  |  |  |  |  |  |  |  |  |  |  |  |  |  |  |  |  |  |  |  |  |  |  |  |  |  |  |  |  |  |  |  |  |  |  |  |  |  |  |  |  |  |  |  |  |  |  |  |  |  |  |  |  |  |  |  |  |  |  |  |  |  |  |  |  |  |  |  |  |  |  |  |  |  |  |  |  |  |  |  |  |  |  |  |  |  |  |  |  |  |  |  |  |  |  |  |  |  |  |  |  |  |  |  |  |  |  |  |  |  |  |  |  |  |  |  |  |  |  |  |  |  |  |  |  |  |  |  |  |  |  |  |  |  |  |  |  |  |  |  |  |  |  |  |  |  |  |  |  |  |  |  |  |  |  |  |  |  |  |  |  |  |  |  |  |  |  |  |  |  |  |  |  |  |  |  |  |  |  |  |  |  |  |  |  |  |  |  |  |  |  |  |  |  |  |  |  |  |  |  |  |  |  |  |  |  |  |  |  |  |  |  |  |  |  |  |  |  |  |  |  |  |  |  |  |  |  |  |  |  |  |  |  |  |  |  |  |  |  |  |  |  |  |  |  |  |  |  |  |  |  |  |  |  |  |  |  |  |  |  |  |  |  |  |  |  |  |  |  |  |  |  |  |  |  |  |  |  |  |  |  |  |  |  |  |  |  |  |  |  |  |  |  |  |  |  |  |  |  |  |  |  |  |  |  |  |  |  |  |  |  |  |  |  |  |  |  |  |  |  |  |  |  |  |  |  |  |  |  |  |  |  |  |  |  |  |  |  |  |  |  |  |  |  |  |  |  |  |  |  |  |  |  |  |  |  |  |  |  |  |  |  |  |  |  |  |  |  |  |  |  |  |  |  |  |  |  |  |  |  |  |  |  |  |  |  |  |  |  |  |  |  |  |  |  |  |  |  |  |  |  |  |  |  |  |  |  |  |  |  |  |  |  |  |  |  |  |  |  |  |  |  |  |  |  |  |  |  |  |  |  |  |  |  |  |  |  |  |  |  |  |  |  |  |  |  |  |  |  |  |  |  |  |  |  |  |  |  |  |  |  |  |  |  |  |  |  |  |  |  |  |  |  |  |  |  |  |  |  |  |  |  |  |  |  |  |  |  |  |  |  |  |  |  |  |  |  |  |  |  |  |  |  |  |  |  |  |  |  |  |  |  |  |  |  |  |  |  |  |  |  |  |  |  |  |  |  |  |  |  |  |  |  |  |  |  |  |  |  |  |  |  |  |  |  |  |  |  |  |  |  |  |  |  |  |  |  |  |  |  |  |  |  |  |  |  |  |  |  |  |  |  |  |  |  |  |  |  |  |  |  |  |  |  |  |  |  |  |  |  |  |  |  |  |  |  |  |  |  |  |  |  |  |  |  |  |  |  |  |  |  |  |  |  |  |  |  |  |  |  |  |  |  |  |  |  |  |  |  |  |  |  |  |  |  |  |  |  |  |  |  |  |  |  |  |  |  |  |  |  |  |  |  |  |  |  |  |  |  |  |  |  |  |  |  |  |  |  |  |  |  |  |  |  |  |  |  |  |  |  |  |  |  |  |  |  |  |  |  |  |  |  |  |  |  |  |  |  |  |  |  |  |  |  |  |  |  |  |  |  |  |  |  |  |  |  |  |  |  |  |  |  |  |  |  |  |  |  |  |  |  |  |  |  |  |  |  |  |  |  |  |  |  |  |  |  |  |  |  |  |  |  |  |  |  |  |  |  |  |  |  |  |  |  |  |  |  |  |  |  |  |  |  |  |  |  |  |  |  |  |  |  |  |  |  |  |  |  |  |  |  |  |  |  |  |  |  |  |  |  |  |  |  |  |  |  |  |  |  |  |  |  |  |  |  |  |  |  |  |  |  |  |  |  |  |  |  |  |  |  |  |  |  |  |  |  |  |  |  |  |  |  |  |  |  |  |  |  |  |  |  |  |  |  |  |  |  |  |  |  |  |  |  |  |  |  |  |  |  |  |  |  |  |  |  |  |  |  |  |  |  |  |  |  |  |  |  |  |  |  |  |  |  |  |  |  |  |  |  |  |  |  |  |  |  |  |  |  |  |  |  |  |  |  |  |  |  |  |  |  |  |  |  |  |  |  |  |  |  |  |  |  |  |  |  |  |  |  |  |  |  |  |  |  |  |  |  |  |  |  |  |  |  |  |  |  |  |  |  |  |  |  |  |  |  |  |  |  |  |  |  |  |  |  |  |  |  |  |  |  |  |  |  |  |  |  |  |  |  |  |  |  |  |  |  |  |  |  |  |  |  |  |  |  |  |  |  |  |  |  |  |  |  |  |  |  |  |  |  |  |  |  |  |  |  |  |  |  |  |  |  |  |  |  |  |  |  |  |  |  |  |  |  |  |  |  |  |  |  |  |  |  |  |  |  |  |  |  |  |  |  |  |  |  |  |  |  |  |  |  |  |  |  |  |  |  |  |  |  |  |  |  |  |  |  |  |  |  |  |  |  |  |  |  |  |  |  |  |  |  |  |  |  |  |  |  |  |  |  |  |  |  |  |  |  |  |  |  |  |  |  |  |  |  |  |  |  |  |  |  |  |  |  |  |  |  |  |  |  |  |  |  |  |  |  |  |  |  |  |  |  |  |  |  |  |  |  |  |  |  |  |  |  |  |  |  |  |  |  |  |  |  |  |  |  |  |  |  |  |  |  |  |  |  |  |  |  |  |  |  |  |  |  |  |  |  |  |  |  |  |  |  |  |  |  |  |  |  |  |  |  |  |  |  |  |  |  |  |  |  |  |  |  |  |  |  |  |  |  |  |  |  |  |  |  |  |  |  |  |  |  |  |  |  |  |  |  |  |  |  |  |  |  |  |  |  |  |  |  |  |  |  |  |  |  |  |  |  |  |  |  |  |  |  |  |  |  |  |  |  |  |  |  |  |  |  |  |  |  |  |  |  |  |  |  |  |  |  |  |  |  |  |  |  |  |  |  |
|-------|--|-------|--|--|--|--|--|--|--|--|--|--|--|--|--|--|--|--|--|--|--|--|--|--|--|--|--|--|--|--|--|--|--|--|--|--|--|--|--|--|--|--|--|--|--|--|--|--|--|--|--|--|--|--|--|--|--|--|--|--|--|--|--|--|--|--|--|--|--|--|--|--|--|--|--|--|--|--|--|--|--|--|--|--|--|--|--|--|--|--|--|--|--|--|--|--|--|--|--|--|--|--|--|--|--|--|--|--|--|--|--|--|--|--|--|--|--|--|--|--|--|--|--|--|--|--|--|--|--|--|--|--|--|--|--|--|--|--|--|--|--|--|--|--|--|--|--|--|--|--|--|--|--|--|--|--|--|--|--|--|--|--|--|--|--|--|--|--|--|--|--|--|--|--|--|--|--|--|--|--|--|--|--|--|--|--|--|--|--|--|--|--|--|--|--|--|--|--|--|--|--|--|--|--|--|--|--|--|--|--|--|--|--|--|--|--|--|--|--|--|--|--|--|--|--|--|--|--|--|--|--|--|--|--|--|--|--|--|--|--|--|--|--|--|--|--|--|--|--|--|--|--|--|--|--|--|--|--|--|--|--|--|--|--|--|--|--|--|--|--|--|--|--|--|--|--|--|--|--|--|--|--|--|--|--|--|--|--|--|--|--|--|--|--|--|--|--|--|--|--|--|--|--|--|--|--|--|--|--|--|--|--|--|--|--|--|--|--|--|--|--|--|--|--|--|--|--|--|--|--|--|--|--|--|--|--|--|--|--|--|--|--|--|--|--|--|--|--|--|--|--|--|--|--|--|--|--|--|--|--|--|--|--|--|--|--|--|--|--|--|--|--|--|--|--|--|--|--|--|--|--|--|--|--|--|--|--|--|--|--|--|--|--|--|--|--|--|--|--|--|--|--|--|--|--|--|--|--|--|--|--|--|--|--|--|--|--|--|--|--|--|--|--|--|--|--|--|--|--|--|--|--|--|--|--|--|--|--|--|--|--|--|--|--|--|--|--|--|--|--|--|--|--|--|--|--|--|--|--|--|--|--|--|--|--|--|--|--|--|--|--|--|--|--|--|--|--|--|--|--|--|--|--|--|--|--|--|--|--|--|--|--|--|--|--|--|--|--|--|--|--|--|--|--|--|--|--|--|--|--|--|--|--|--|--|--|--|--|--|--|--|--|--|--|--|--|--|--|--|--|--|--|--|--|--|--|--|--|--|--|--|--|--|--|--|--|--|--|--|--|--|--|--|--|--|--|--|--|--|--|--|--|--|--|--|--|--|--|--|--|--|--|--|--|--|--|--|--|--|--|--|--|--|--|--|--|--|--|--|--|--|--|--|--|--|--|--|--|--|--|--|--|--|--|--|--|--|--|--|--|--|--|--|--|--|--|--|--|--|--|--|--|--|--|--|--|--|--|--|--|--|--|--|--|--|--|--|--|--|--|--|--|--|--|--|--|--|--|--|--|--|--|--|--|--|--|--|--|--|--|--|--|--|--|--|--|--|--|--|--|--|--|--|--|--|--|--|--|--|--|--|--|--|--|--|--|--|--|--|--|--|--|--|--|--|--|--|--|--|--|--|--|--|--|--|--|--|--|--|--|--|--|--|--|--|--|--|--|--|--|--|--|--|--|--|--|--|--|--|--|--|--|--|--|--|--|--|--|--|--|--|--|--|--|--|--|--|--|--|--|--|--|--|--|--|--|--|--|--|--|--|--|--|--|--|--|--|--|--|--|--|--|--|--|--|--|--|--|--|--|--|--|--|--|--|--|--|--|--|--|--|--|--|--|--|--|--|--|--|--|--|--|--|--|--|--|--|--|--|--|--|--|--|--|--|--|--|--|--|--|--|--|--|--|--|--|--|--|--|--|--|--|--|--|--|--|--|--|--|--|--|--|--|--|--|--|--|--|--|--|--|--|--|--|--|--|--|--|--|--|--|--|--|--|--|--|--|--|--|--|--|--|--|--|--|--|--|--|--|--|--|--|--|--|--|--|--|--|--|--|--|--|--|--|--|--|--|--|--|--|--|--|--|--|--|--|--|--|--|--|--|--|--|--|--|--|--|--|--|--|--|--|--|--|--|--|--|--|--|--|--|--|--|--|--|--|--|--|--|--|--|--|--|--|--|--|--|--|--|--|--|--|--|--|--|--|--|--|--|--|--|--|--|--|--|--|--|--|--|--|--|--|--|--|--|--|--|--|--|--|--|--|--|--|--|--|--|--|--|--|--|--|--|--|--|--|--|--|--|--|--|--|--|--|--|--|--|--|--|--|--|--|--|--|--|--|--|--|--|--|--|--|--|--|--|--|--|--|--|--|--|--|--|--|--|--|--|--|--|--|--|--|--|--|--|--|--|--|--|--|--|--|--|--|--|--|--|--|--|--|--|--|--|--|--|--|--|--|--|--|--|--|--|--|--|--|--|--|--|--|--|--|--|--|--|--|--|--|--|--|--|--|--|--|--|--|--|--|--|--|--|--|--|--|--|--|--|--|--|--|--|--|--|--|--|--|--|--|--|--|--|--|--|--|--|--|--|--|--|--|--|--|--|--|--|--|--|--|--|--|--|--|--|--|--|--|--|--|--|--|--|--|--|--|--|--|--|--|--|--|--|--|--|--|--|--|--|--|--|--|--|--|--|--|--|--|--|--|--|--|--|--|--|--|--|--|--|--|--|--|--|--|--|--|--|--|--|--|--|--|--|--|--|--|--|--|--|--|--|--|--|--|--|--|--|--|--|--|--|--|--|--|--|--|--|--|--|--|--|--|--|--|--|--|--|--|--|--|--|--|--|--|--|--|--|--|--|--|--|--|--|--|--|--|--|--|--|--|--|--|--|--|--|--|--|--|--|--|--|--|--|--|--|--|--|--|--|--|--|--|--|--|--|--|--|--|--|--|--|--|--|--|--|--|--|--|--|--|--|--|--|--|--|--|--|--|--|--|--|--|--|--|--|--|--|--|--|--|--|--|--|--|--|--|--|--|--|--|--|--|--|--|--|--|--|--|--|--|--|--|--|--|--|--|--|--|--|--|--|--|--|--|--|--|--|--|--|--|--|--|--|--|--|--|--|--|--|--|--|--|--|--|--|--|--|--|--|--|--|--|--|--|--|--|--|--|--|--|--|--|--|--|--|--|--|--|--|--|--|--|--|--|--|--|--|--|--|--|--|--|--|--|--|--|--|--|--|--|--|--|--|--|--|--|--|--|--|--|--|--|--|--|--|--|--|--|--|--|--|--|--|--|--|--|--|--|--|--|--|--|--|--|--|--|--|--|--|--|--|--|--|--|--|--|--|--|--|--|--|--|--|--|--|--|--|--|--|--|--|--|--|--|--|--|--|--|--|--|--|--|--|--|--|--|--|--|--|--|--|--|--|--|--|--|--|--|--|--|--|--|--|--|--|--|--|--|--|--|--|--|--|--|--|--|--|--|--|--|--|--|--|--|--|--|--|--|--|--|--|--|--|--|--|--|--|--|--|--|--|--|--|--|--|--|--|--|--|--|--|--|
|-------|--|-------|--|--|--|--|--|--|--|--|--|--|--|--|--|--|--|--|--|--|--|--|--|--|--|--|--|--|--|--|--|--|--|--|--|--|--|--|--|--|--|--|--|--|--|--|--|--|--|--|--|--|--|--|--|--|--|--|--|--|--|--|--|--|--|--|--|--|--|--|--|--|--|--|--|--|--|--|--|--|--|--|--|--|--|--|--|--|--|--|--|--|--|--|--|--|--|--|--|--|--|--|--|--|--|--|--|--|--|--|--|--|--|--|--|--|--|--|--|--|--|--|--|--|--|--|--|--|--|--|--|--|--|--|--|--|--|--|--|--|--|--|--|--|--|--|--|--|--|--|--|--|--|--|--|--|--|--|--|--|--|--|--|--|--|--|--|--|--|--|--|--|--|--|--|--|--|--|--|--|--|--|--|--|--|--|--|--|--|--|--|--|--|--|--|--|--|--|--|--|--|--|--|--|--|--|--|--|--|--|--|--|--|--|--|--|--|--|--|--|--|--|--|--|--|--|--|--|--|--|--|--|--|--|--|--|--|--|--|--|--|--|--|--|--|--|--|--|--|--|--|--|--|--|--|--|--|--|--|--|--|--|--|--|--|--|--|--|--|--|--|--|--|--|--|--|--|--|--|--|--|--|--|--|--|--|--|--|--|--|--|--|--|--|--|--|--|--|--|--|--|--|--|--|--|--|--|--|--|--|--|--|--|--|--|--|--|--|--|--|--|--|--|--|--|--|--|--|--|--|--|--|--|--|--|--|--|--|--|--|--|--|--|--|--|--|--|--|--|--|--|--|--|--|--|--|--|--|--|--|--|--|--|--|--|--|--|--|--|--|--|--|--|--|--|--|--|--|--|--|--|--|--|--|--|--|--|--|--|--|--|--|--|--|--|--|--|--|--|--|--|--|--|--|--|--|--|--|--|--|--|--|--|--|--|--|--|--|--|--|--|--|--|--|--|--|--|--|--|--|--|--|--|--|--|--|--|--|--|--|--|--|--|--|--|--|--|--|--|--|--|--|--|--|--|--|--|--|--|--|--|--|--|--|--|--|--|--|--|--|--|--|--|--|--|--|--|--|--|--|--|--|--|--|--|--|--|--|--|--|--|--|--|--|--|--|--|--|--|--|--|--|--|--|--|--|--|--|--|--|--|--|--|--|--|--|--|--|--|--|--|--|--|--|--|--|--|--|--|--|--|--|--|--|--|--|--|--|--|--|--|--|--|--|--|--|--|--|--|--|--|--|--|--|--|--|--|--|--|--|--|--|--|--|--|--|--|--|--|--|--|--|--|--|--|--|--|--|--|--|--|--|--|--|--|--|--|--|--|--|--|--|--|--|--|--|--|--|--|--|--|--|--|--|--|--|--|--|--|--|--|--|--|--|--|--|--|--|--|--|--|--|--|--|--|--|--|--|--|--|--|--|--|--|--|--|--|--|--|--|--|--|--|--|--|--|--|--|--|--|--|--|--|--|--|--|--|--|--|--|--|--|--|--|--|--|--|--|--|--|--|--|--|--|--|--|--|--|--|--|--|--|--|--|--|--|--|--|--|--|--|--|--|--|--|--|--|--|--|--|--|--|--|--|--|--|--|--|--|--|--|--|--|--|--|--|--|--|--|--|--|--|--|--|--|--|--|--|--|--|--|--|--|--|--|--|--|--|--|--|--|--|--|--|--|--|--|--|--|--|--|--|--|--|--|--|--|--|--|--|--|--|--|--|--|--|--|--|--|--|--|--|--|--|--|--|--|--|--|--|--|--|--|--|--|--|--|--|--|--|--|--|--|--|--|--|--|--|--|--|--|--|--|--|--|--|--|--|--|--|--|--|--|--|--|--|--|--|--|--|--|--|--|--|--|--|--|--|--|--|--|--|--|--|--|--|--|--|--|--|--|--|--|--|--|--|--|--|--|--|--|--|--|--|--|--|--|--|--|--|--|--|--|--|--|--|--|--|--|--|--|--|--|--|--|--|--|--|--|--|--|--|--|--|--|--|--|--|--|--|--|--|--|--|--|--|--|--|--|--|--|--|--|--|--|--|--|--|--|--|--|--|--|--|--|--|--|--|--|--|--|--|--|--|--|--|--|--|--|--|--|--|--|--|--|--|--|--|--|--|--|--|--|--|--|--|--|--|--|--|--|--|--|--|--|--|--|--|--|--|--|--|--|--|--|--|--|--|--|--|--|--|--|--|--|--|--|--|--|--|--|--|--|--|--|--|--|--|--|--|--|--|--|--|--|--|--|--|--|--|--|--|--|--|--|--|--|--|--|--|--|--|--|--|--|--|--|--|--|--|--|--|--|--|--|--|--|--|--|--|--|--|--|--|--|--|--|--|--|--|--|--|--|--|--|--|--|--|--|--|--|--|--|--|--|--|--|--|--|--|--|--|--|--|--|--|--|--|--|--|--|--|--|--|--|--|--|--|--|--|--|--|--|--|--|--|--|--|--|--|--|--|--|--|--|--|--|--|--|--|--|--|--|--|--|--|--|--|--|--|--|--|--|--|--|--|--|--|--|--|--|--|--|--|--|--|--|--|--|--|--|--|--|--|--|--|--|--|--|--|--|--|--|--|--|--|--|--|--|--|--|--|--|--|--|--|--|--|--|--|--|--|--|--|--|--|--|--|--|--|--|--|--|--|--|--|--|--|--|--|--|--|--|--|--|--|--|--|--|--|--|--|--|--|--|--|--|--|--|--|--|--|--|--|--|--|--|--|--|--|--|--|--|--|--|--|--|--|--|--|--|--|--|--|--|--|--|--|--|--|--|--|--|--|--|--|--|--|--|--|--|--|--|--|--|--|--|--|--|--|--|--|--|--|--|--|--|--|--|--|--|--|--|--|--|--|--|--|--|--|--|--|--|--|--|--|--|--|--|--|--|--|--|--|--|--|--|--|--|--|--|--|--|--|--|--|--|--|--|--|--|--|--|--|--|--|--|--|--|--|--|--|--|--|--|--|--|--|--|--|--|--|--|--|--|--|--|--|--|--|--|--|--|--|--|--|--|--|--|--|--|--|--|--|--|--|--|--|--|--|--|--|--|--|--|--|--|--|--|--|--|--|--|--|--|--|--|--|--|--|--|--|--|--|--|--|--|--|--|--|--|--|--|--|--|--|--|--|--|--|--|--|--|--|--|--|--|--|--|--|--|--|--|--|--|--|--|--|--|--|--|--|--|--|--|--|--|--|--|--|--|--|--|--|--|--|--|--|--|--|--|--|--|--|--|--|--|--|--|--|--|--|--|--|--|--|--|--|--|--|--|--|--|--|--|--|--|--|--|--|--|--|--|--|--|--|--|--|--|--|--|--|--|--|--|--|--|--|--|--|--|--|--|--|--|--|--|--|--|--|--|--|--|--|--|--|--|--|--|--|--|--|--|--|--|--|--|--|--|--|--|--|--|--|--|--|--|--|--|--|--|--|--|--|--|--|--|--|--|--|--|--|--|--|--|--|--|--|--|--|--|--|--|--|--|--|--|--|--|--|--|--|--|--|--|--|--|--|--|--|



## Supplementary material 5 – S5

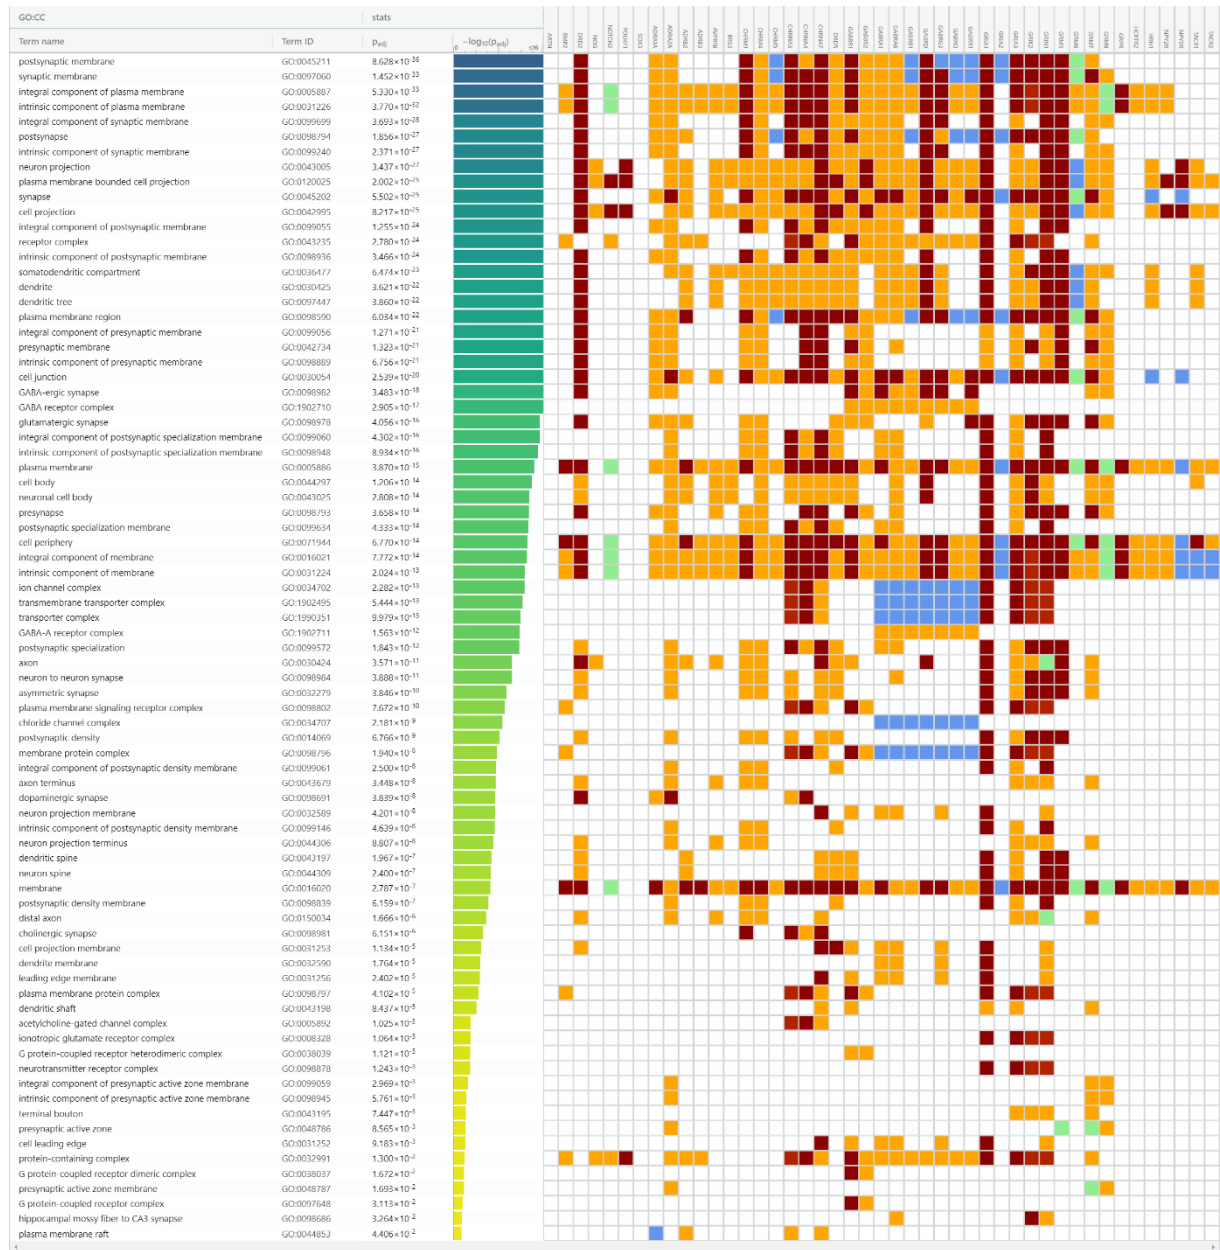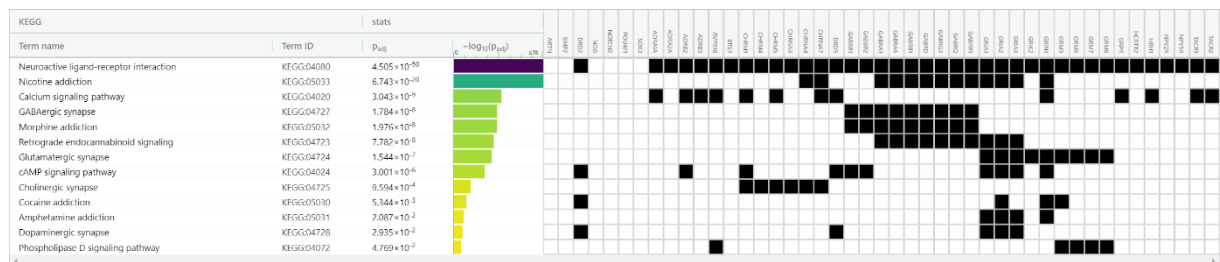





## Enrichment analyzes – upregulated genes in the prefrontal cortices of one-month-old females that were prenatally exposed to the triclocarban

### Curated reactome

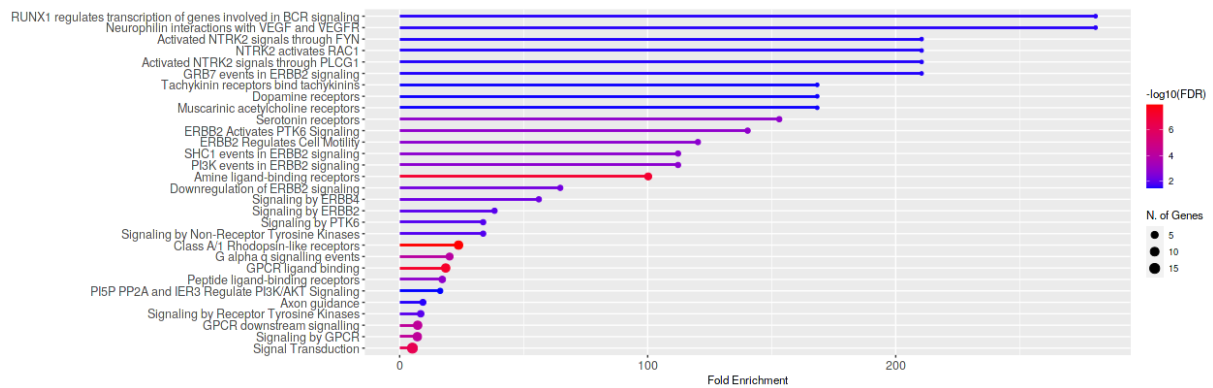

### GO Cellular Component

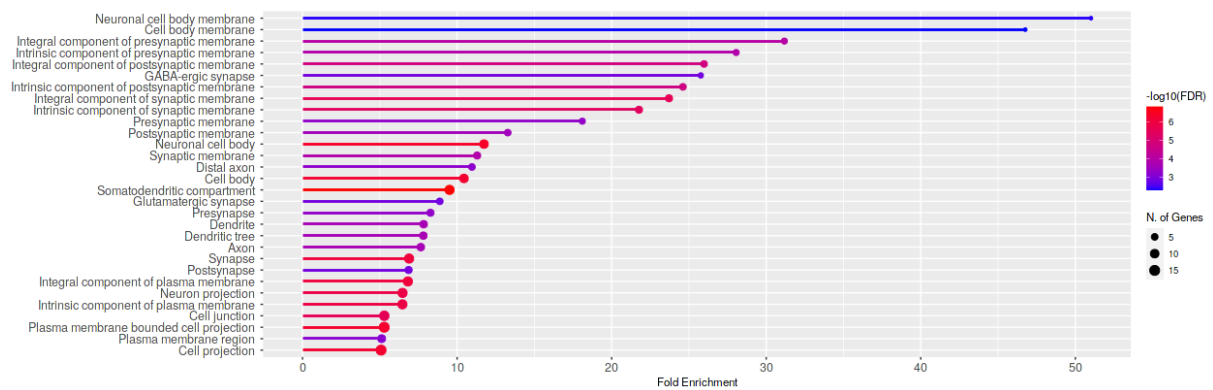

### GO Molecular Function

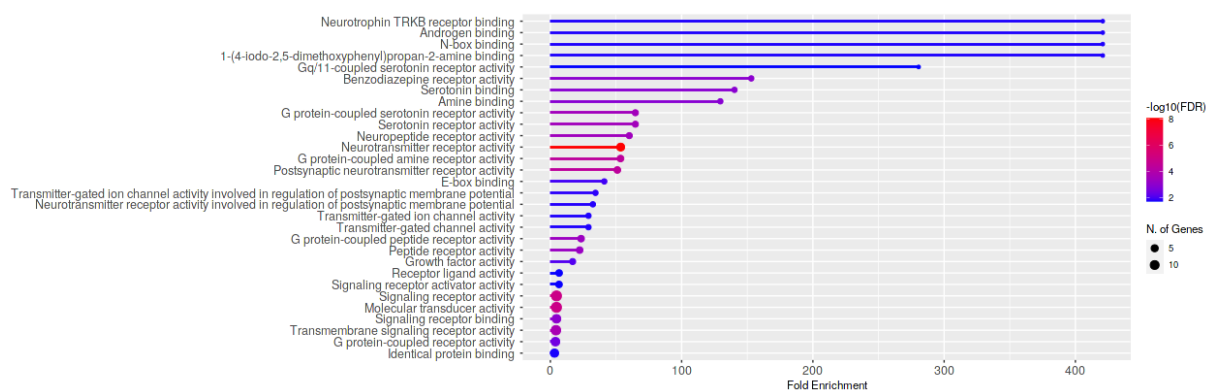

## Supplementary material 6 – S6

**KEGG**

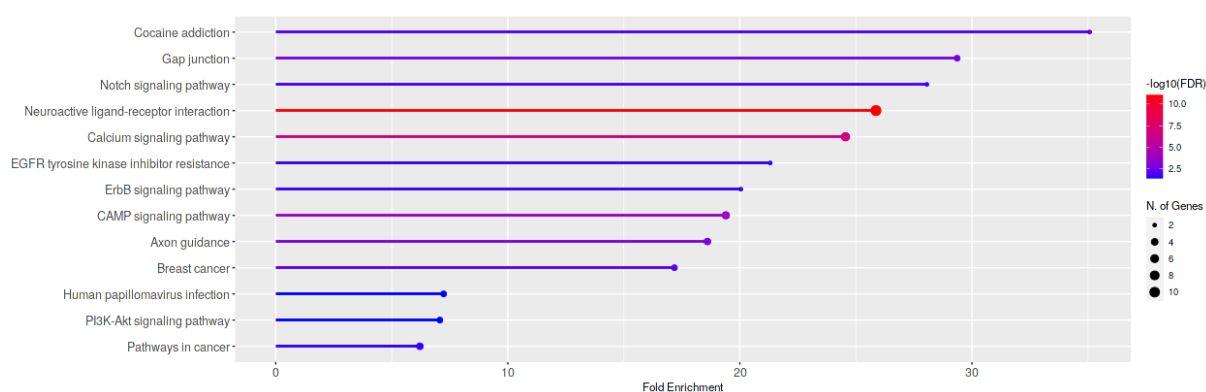

## g:Profiler - g:GOSt

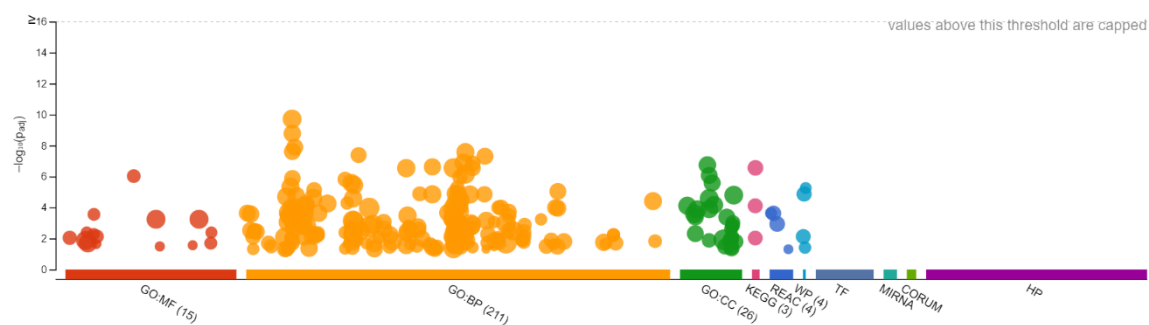[illegible]

## Supplementary material 6 – S6

[illegible]

## Supplementary material 6 – S6

[illegible]

| KEGG      |         | stats            |                       |     |      |      |     |     |      |       |       |       |       |       |       |       |       |        |        |        |        |        |        |        |        |        |        |        |        |        |        |        |        |        |        |        |        |        |        |        |        |        |        |        |        |        |        |        |        |        |        |        |        |        |        |        |        |        |        |        |        |        |        |        |        |        |        |        |        |        |        |        |        |        |        |        |        |        |        |        |        |        |        |        |        |        |        |        |        |        |        |        |        |        |        |        |        |        |        |        |        |        |        |        |        |        |        |         |         |         |         |         |         |         |         |         |         |         |         |         |         |         |         |         |         |         |         |         |         |         |         |         |         |         |         |         |         |         |         |         |         |         |         |         |         |         |         |         |         |         |         |         |         |         |         |         |         |         |         |         |         |         |         |         |         |         |         |         |         |         |         |         |         |         |         |         |         |         |         |         |         |         |         |         |         |         |         |         |         |         |         |         |         |         |         |         |         |         |         |         |         |         |         |         |         |         |         |         |         |         |         |         |         |         |         |         |         |         |         |         |         |         |         |         |         |         |         |         |         |         |         |         |         |         |         |         |         |         |         |         |         |         |         |         |         |         |         |         |         |         |         |         |         |         |         |         |         |         |         |         |         |         |         |         |         |         |         |         |         |         |         |         |         |         |         |         |         |         |         |         |         |         |         |         |         |         |         |         |         |         |         |         |         |         |         |         |         |         |         |         |         |         |         |         |         |         |         |         |         |         |         |         |         |         |         |         |         |         |         |         |         |         |         |         |         |         |         |         |         |         |         |         |         |         |         |         |         |         |         |         |         |         |         |         |         |         |         |         |         |         |         |         |         |         |         |         |         |         |         |         |         |         |         |         |         |         |         |         |         |         |         |         |         |         |         |         |         |         |         |         |         |         |         |         |         |         |         |         |         |         |         |         |         |         |         |         |         |         |         |         |         |         |         |         |         |         |         |         |         |         |         |         |         |         |         |         |         |         |         |         |         |         |         |         |         |         |         |         |         |         |         |         |         |         |         |         |         |         |         |         |         |         |         |         |         |         |         |         |         |         |         |         |         |         |         |         |         |         |         |         |         |         |         |         |         |         |         |         |         |         |         |         |         |         |         |         |         |         |         |         |         |         |         |         |         |         |         |         |         |         |         |         |         |         |         |         |         |         |         |         |         |         |         |         |         |         |         |         |         |         |         |         |         |         |         |         |         |         |         |         |         |         |         |         |         |         |         |         |         |         |         |         |         |         |         |         |         |         |         |         |         |         |         |         |         |         |         |         |         |         |         |         |         |         |         |         |         |         |         |         |         |         |         |         |         |         |         |         |         |         |         |         |         |         |         |         |         |         |         |         |         |         |         |         |         |         |         |         |         |         |         |         |         |         |         |         |         |         |         |         |         |         |         |         |         |         |         |         |         |         |         |         |         |         |         |         |         |         |         |         |         |         |         |         |         |         |         |         |         |         |         |         |         |         |         |         |         |         |         |         |         |         |         |         |         |         |         |         |         |         |         |         |         |         |         |         |         |         |         |         |         |         |         |         |         |         |         |         |         |         |         |         |         |         |         |         |         |         |         |         |         |         |         |         |         |         |         |         |         |         |         |         |         |         |         |         |         |         |         |         |         |         |         |         |         |         |         |         |         |         |         |         |         |         |         |         |         |         |         |         |         |         |         |         |         |         |         |         |         |         |         |         |         |         |         |         |         |         |         |         |         |         |         |         |         |         |         |         |         |         |         |         |         |         |         |         |         |         |         |         |         |         |         |         |         |         |         |         |         |         |         |         |         |         |         |         |         |         |         |         |         |         |         |         |         |         |         |         |         |         |         |         |         |         |         |         |         |         |         |         |         |         |         |         |         |         |         |         |         |         |         |         |         |         |         |         |         |         |         |         |         |         |         |         |         |         |         |         |         |         |         |         |         |         |         |         |         |         |         |         |         |         |         |         |         |         |         |         |         |         |         |         |         |         |         |         |         |         |         |         |         |         |         |         |         |         |         |         |         |         |         |         |         |         |         |         |         |         |         |         |         |         |         |         |         |         |         |         |         |         |         |         |         |         |         |         |         |         |         |         |         |         |         |         |         |         |         |         |         |         |         |         |         |         |         |         |         |         |         |         |         |         |         |         |         |         |         |         |         |         |         |         |         |         |         |         |         |         |         |         |         |         |         |         |         |         |         |         |         |         |         |         |         |         |         |         |         |         |         |         |         |         |         |         |         |         |         |         |         |         |         |         |         |         |         |         |         |         |         |         |         |         |         |         |         |         |         |         |         |         |         |         |         |         |         |         |         |         |         |         |         |         |         |         |         |         |         |          |          |          |          |          |          |          |          |          |          |          |          |          |          |          |          |          |          |          |          |          |          |          |          |          |          |          |          |          |          |          |          |          |          |          |          |          |          |          |          |          |          |          |          |          |          |          |          |          |          |          |          |          |          |          |          |          |          |          |          |          |          |          |          |          |          |          |          |          |          |          |          |          |          |          |          |          |          |          |          |          |          |          |          |          |          |          |          |          |          |          |          |          |          |          |          |          |          |          |          |          |          |          |          |          |          |          |          |          |          |          |          |          |          |          |          |
|-----------|---------|------------------|-----------------------|-----|------|------|-----|-----|------|-------|-------|-------|-------|-------|-------|-------|-------|--------|--------|--------|--------|--------|--------|--------|--------|--------|--------|--------|--------|--------|--------|--------|--------|--------|--------|--------|--------|--------|--------|--------|--------|--------|--------|--------|--------|--------|--------|--------|--------|--------|--------|--------|--------|--------|--------|--------|--------|--------|--------|--------|--------|--------|--------|--------|--------|--------|--------|--------|--------|--------|--------|--------|--------|--------|--------|--------|--------|--------|--------|--------|--------|--------|--------|--------|--------|--------|--------|--------|--------|--------|--------|--------|--------|--------|--------|--------|--------|--------|--------|--------|--------|--------|--------|--------|--------|--------|--------|---------|---------|---------|---------|---------|---------|---------|---------|---------|---------|---------|---------|---------|---------|---------|---------|---------|---------|---------|---------|---------|---------|---------|---------|---------|---------|---------|---------|---------|---------|---------|---------|---------|---------|---------|---------|---------|---------|---------|---------|---------|---------|---------|---------|---------|---------|---------|---------|---------|---------|---------|---------|---------|---------|---------|---------|---------|---------|---------|---------|---------|---------|---------|---------|---------|---------|---------|---------|---------|---------|---------|---------|---------|---------|---------|---------|---------|---------|---------|---------|---------|---------|---------|---------|---------|---------|---------|---------|---------|---------|---------|---------|---------|---------|---------|---------|---------|---------|---------|---------|---------|---------|---------|---------|---------|---------|---------|---------|---------|---------|---------|---------|---------|---------|---------|---------|---------|---------|---------|---------|---------|---------|---------|---------|---------|---------|---------|---------|---------|---------|---------|---------|---------|---------|---------|---------|---------|---------|---------|---------|---------|---------|---------|---------|---------|---------|---------|---------|---------|---------|---------|---------|---------|---------|---------|---------|---------|---------|---------|---------|---------|---------|---------|---------|---------|---------|---------|---------|---------|---------|---------|---------|---------|---------|---------|---------|---------|---------|---------|---------|---------|---------|---------|---------|---------|---------|---------|---------|---------|---------|---------|---------|---------|---------|---------|---------|---------|---------|---------|---------|---------|---------|---------|---------|---------|---------|---------|---------|---------|---------|---------|---------|---------|---------|---------|---------|---------|---------|---------|---------|---------|---------|---------|---------|---------|---------|---------|---------|---------|---------|---------|---------|---------|---------|---------|---------|---------|---------|---------|---------|---------|---------|---------|---------|---------|---------|---------|---------|---------|---------|---------|---------|---------|---------|---------|---------|---------|---------|---------|---------|---------|---------|---------|---------|---------|---------|---------|---------|---------|---------|---------|---------|---------|---------|---------|---------|---------|---------|---------|---------|---------|---------|---------|---------|---------|---------|---------|---------|---------|---------|---------|---------|---------|---------|---------|---------|---------|---------|---------|---------|---------|---------|---------|---------|---------|---------|---------|---------|---------|---------|---------|---------|---------|---------|---------|---------|---------|---------|---------|---------|---------|---------|---------|---------|---------|---------|---------|---------|---------|---------|---------|---------|---------|---------|---------|---------|---------|---------|---------|---------|---------|---------|---------|---------|---------|---------|---------|---------|---------|---------|---------|---------|---------|---------|---------|---------|---------|---------|---------|---------|---------|---------|---------|---------|---------|---------|---------|---------|---------|---------|---------|---------|---------|---------|---------|---------|---------|---------|---------|---------|---------|---------|---------|---------|---------|---------|---------|---------|---------|---------|---------|---------|---------|---------|---------|---------|---------|---------|---------|---------|---------|---------|---------|---------|---------|---------|---------|---------|---------|---------|---------|---------|---------|---------|---------|---------|---------|---------|---------|---------|---------|---------|---------|---------|---------|---------|---------|---------|---------|---------|---------|---------|---------|---------|---------|---------|---------|---------|---------|---------|---------|---------|---------|---------|---------|---------|---------|---------|---------|---------|---------|---------|---------|---------|---------|---------|---------|---------|---------|---------|---------|---------|---------|---------|---------|---------|---------|---------|---------|---------|---------|---------|---------|---------|---------|---------|---------|---------|---------|---------|---------|---------|---------|---------|---------|---------|---------|---------|---------|---------|---------|---------|---------|---------|---------|---------|---------|---------|---------|---------|---------|---------|---------|---------|---------|---------|---------|---------|---------|---------|---------|---------|---------|---------|---------|---------|---------|---------|---------|---------|---------|---------|---------|---------|---------|---------|---------|---------|---------|---------|---------|---------|---------|---------|---------|---------|---------|---------|---------|---------|---------|---------|---------|---------|---------|---------|---------|---------|---------|---------|---------|---------|---------|---------|---------|---------|---------|---------|---------|---------|---------|---------|---------|---------|---------|---------|---------|---------|---------|---------|---------|---------|---------|---------|---------|---------|---------|---------|---------|---------|---------|---------|---------|---------|---------|---------|---------|---------|---------|---------|---------|---------|---------|---------|---------|---------|---------|---------|---------|---------|---------|---------|---------|---------|---------|---------|---------|---------|---------|---------|---------|---------|---------|---------|---------|---------|---------|---------|---------|---------|---------|---------|---------|---------|---------|---------|---------|---------|---------|---------|---------|---------|---------|---------|---------|---------|---------|---------|---------|---------|---------|---------|---------|---------|---------|---------|---------|---------|---------|---------|---------|---------|---------|---------|---------|---------|---------|---------|---------|---------|---------|---------|---------|---------|---------|---------|---------|---------|---------|---------|---------|---------|---------|---------|---------|---------|---------|---------|---------|---------|---------|---------|---------|---------|---------|---------|---------|---------|---------|---------|---------|---------|---------|---------|---------|---------|---------|---------|---------|---------|---------|---------|---------|---------|---------|---------|---------|---------|---------|---------|---------|---------|---------|---------|---------|---------|---------|---------|---------|---------|---------|---------|---------|---------|---------|---------|---------|---------|---------|---------|---------|---------|---------|---------|---------|---------|---------|---------|---------|---------|---------|---------|---------|---------|---------|---------|---------|---------|---------|---------|---------|---------|---------|---------|---------|---------|---------|---------|---------|---------|---------|---------|---------|---------|---------|---------|---------|---------|---------|---------|---------|---------|---------|---------|---------|---------|---------|---------|---------|---------|---------|---------|---------|---------|---------|---------|---------|---------|---------|---------|---------|---------|---------|---------|---------|---------|---------|---------|---------|---------|---------|---------|---------|---------|---------|---------|---------|---------|---------|---------|---------|---------|---------|---------|---------|---------|---------|---------|---------|---------|---------|---------|---------|---------|---------|---------|---------|---------|---------|---------|---------|---------|---------|---------|---------|---------|---------|---------|---------|---------|---------|---------|---------|---------|---------|---------|---------|---------|---------|---------|---------|---------|---------|---------|---------|---------|---------|---------|---------|---------|---------|---------|---------|---------|---------|---------|---------|---------|---------|---------|---------|---------|---------|---------|---------|---------|---------|---------|---------|---------|---------|---------|---------|---------|---------|---------|---------|---------|---------|---------|---------|---------|---------|---------|---------|---------|---------|---------|---------|---------|----------|----------|----------|----------|----------|----------|----------|----------|----------|----------|----------|----------|----------|----------|----------|----------|----------|----------|----------|----------|----------|----------|----------|----------|----------|----------|----------|----------|----------|----------|----------|----------|----------|----------|----------|----------|----------|----------|----------|----------|----------|----------|----------|----------|----------|----------|----------|----------|----------|----------|----------|----------|----------|----------|----------|----------|----------|----------|----------|----------|----------|----------|----------|----------|----------|----------|----------|----------|----------|----------|----------|----------|----------|----------|----------|----------|----------|----------|----------|----------|----------|----------|----------|----------|----------|----------|----------|----------|----------|----------|----------|----------|----------|----------|----------|----------|----------|----------|----------|----------|----------|----------|----------|----------|----------|----------|----------|----------|----------|----------|----------|----------|----------|----------|----------|----------|
| Term name | Term ID | P <sub>adj</sub> | $-\log_{10}(P_{adj})$ | BCR | CD40 | ETBR | ESR | IL6 | IL6R | IL6R2 | IL6R3 | IL6R4 | IL6R5 | IL6R6 | IL6R7 | IL6R8 | IL6R9 | IL6R10 | IL6R11 | IL6R12 | IL6R13 | IL6R14 | IL6R15 | IL6R16 | IL6R17 | IL6R18 | IL6R19 | IL6R20 | IL6R21 | IL6R22 | IL6R23 | IL6R24 | IL6R25 | IL6R26 | IL6R27 | IL6R28 | IL6R29 | IL6R30 | IL6R31 | IL6R32 | IL6R33 | IL6R34 | IL6R35 | IL6R36 | IL6R37 | IL6R38 | IL6R39 | IL6R40 | IL6R41 | IL6R42 | IL6R43 | IL6R44 | IL6R45 | IL6R46 | IL6R47 | IL6R48 | IL6R49 | IL6R50 | IL6R51 | IL6R52 | IL6R53 | IL6R54 | IL6R55 | IL6R56 | IL6R57 | IL6R58 | IL6R59 | IL6R60 | IL6R61 | IL6R62 | IL6R63 | IL6R64 | IL6R65 | IL6R66 | IL6R67 | IL6R68 | IL6R69 | IL6R70 | IL6R71 | IL6R72 | IL6R73 | IL6R74 | IL6R75 | IL6R76 | IL6R77 | IL6R78 | IL6R79 | IL6R80 | IL6R81 | IL6R82 | IL6R83 | IL6R84 | IL6R85 | IL6R86 | IL6R87 | IL6R88 | IL6R89 | IL6R90 | IL6R91 | IL6R92 | IL6R93 | IL6R94 | IL6R95 | IL6R96 | IL6R97 | IL6R98 | IL6R99 | IL6R100 | IL6R101 | IL6R102 | IL6R103 | IL6R104 | IL6R105 | IL6R106 | IL6R107 | IL6R108 | IL6R109 | IL6R110 | IL6R111 | IL6R112 | IL6R113 | IL6R114 | IL6R115 | IL6R116 | IL6R117 | IL6R118 | IL6R119 | IL6R120 | IL6R121 | IL6R122 | IL6R123 | IL6R124 | IL6R125 | IL6R126 | IL6R127 | IL6R128 | IL6R129 | IL6R130 | IL6R131 | IL6R132 | IL6R133 | IL6R134 | IL6R135 | IL6R136 | IL6R137 | IL6R138 | IL6R139 | IL6R140 | IL6R141 | IL6R142 | IL6R143 | IL6R144 | IL6R145 | IL6R146 | IL6R147 | IL6R148 | IL6R149 | IL6R150 | IL6R151 | IL6R152 | IL6R153 | IL6R154 | IL6R155 | IL6R156 | IL6R157 | IL6R158 | IL6R159 | IL6R160 | IL6R161 | IL6R162 | IL6R163 | IL6R164 | IL6R165 | IL6R166 | IL6R167 | IL6R168 | IL6R169 | IL6R170 | IL6R171 | IL6R172 | IL6R173 | IL6R174 | IL6R175 | IL6R176 | IL6R177 | IL6R178 | IL6R179 | IL6R180 | IL6R181 | IL6R182 | IL6R183 | IL6R184 | IL6R185 | IL6R186 | IL6R187 | IL6R188 | IL6R189 | IL6R190 | IL6R191 | IL6R192 | IL6R193 | IL6R194 | IL6R195 | IL6R196 | IL6R197 | IL6R198 | IL6R199 | IL6R200 | IL6R201 | IL6R202 | IL6R203 | IL6R204 | IL6R205 | IL6R206 | IL6R207 | IL6R208 | IL6R209 | IL6R210 | IL6R211 | IL6R212 | IL6R213 | IL6R214 | IL6R215 | IL6R216 | IL6R217 | IL6R218 | IL6R219 | IL6R220 | IL6R221 | IL6R222 | IL6R223 | IL6R224 | IL6R225 | IL6R226 | IL6R227 | IL6R228 | IL6R229 | IL6R230 | IL6R231 | IL6R232 | IL6R233 | IL6R234 | IL6R235 | IL6R236 | IL6R237 | IL6R238 | IL6R239 | IL6R240 | IL6R241 | IL6R242 | IL6R243 | IL6R244 | IL6R245 | IL6R246 | IL6R247 | IL6R248 | IL6R249 | IL6R250 | IL6R251 | IL6R252 | IL6R253 | IL6R254 | IL6R255 | IL6R256 | IL6R257 | IL6R258 | IL6R259 | IL6R260 | IL6R261 | IL6R262 | IL6R263 | IL6R264 | IL6R265 | IL6R266 | IL6R267 | IL6R268 | IL6R269 | IL6R270 | IL6R271 | IL6R272 | IL6R273 | IL6R274 | IL6R275 | IL6R276 | IL6R277 | IL6R278 | IL6R279 | IL6R280 | IL6R281 | IL6R282 | IL6R283 | IL6R284 | IL6R285 | IL6R286 | IL6R287 | IL6R288 | IL6R289 | IL6R290 | IL6R291 | IL6R292 | IL6R293 | IL6R294 | IL6R295 | IL6R296 | IL6R297 | IL6R298 | IL6R299 | IL6R300 | IL6R301 | IL6R302 | IL6R303 | IL6R304 | IL6R305 | IL6R306 | IL6R307 | IL6R308 | IL6R309 | IL6R310 | IL6R311 | IL6R312 | IL6R313 | IL6R314 | IL6R315 | IL6R316 | IL6R317 | IL6R318 | IL6R319 | IL6R320 | IL6R321 | IL6R322 | IL6R323 | IL6R324 | IL6R325 | IL6R326 | IL6R327 | IL6R328 | IL6R329 | IL6R330 | IL6R331 | IL6R332 | IL6R333 | IL6R334 | IL6R335 | IL6R336 | IL6R337 | IL6R338 | IL6R339 | IL6R340 | IL6R341 | IL6R342 | IL6R343 | IL6R344 | IL6R345 | IL6R346 | IL6R347 | IL6R348 | IL6R349 | IL6R350 | IL6R351 | IL6R352 | IL6R353 | IL6R354 | IL6R355 | IL6R356 | IL6R357 | IL6R358 | IL6R359 | IL6R360 | IL6R361 | IL6R362 | IL6R363 | IL6R364 | IL6R365 | IL6R366 | IL6R367 | IL6R368 | IL6R369 | IL6R370 | IL6R371 | IL6R372 | IL6R373 | IL6R374 | IL6R375 | IL6R376 | IL6R377 | IL6R378 | IL6R379 | IL6R380 | IL6R381 | IL6R382 | IL6R383 | IL6R384 | IL6R385 | IL6R386 | IL6R387 | IL6R388 | IL6R389 | IL6R390 | IL6R391 | IL6R392 | IL6R393 | IL6R394 | IL6R395 | IL6R396 | IL6R397 | IL6R398 | IL6R399 | IL6R400 | IL6R401 | IL6R402 | IL6R403 | IL6R404 | IL6R405 | IL6R406 | IL6R407 | IL6R408 | IL6R409 | IL6R410 | IL6R411 | IL6R412 | IL6R413 | IL6R414 | IL6R415 | IL6R416 | IL6R417 | IL6R418 | IL6R419 | IL6R420 | IL6R421 | IL6R422 | IL6R423 | IL6R424 | IL6R425 | IL6R426 | IL6R427 | IL6R428 | IL6R429 | IL6R430 | IL6R431 | IL6R432 | IL6R433 | IL6R434 | IL6R435 | IL6R436 | IL6R437 | IL6R438 | IL6R439 | IL6R440 | IL6R441 | IL6R442 | IL6R443 | IL6R444 | IL6R445 | IL6R446 | IL6R447 | IL6R448 | IL6R449 | IL6R450 | IL6R451 | IL6R452 | IL6R453 | IL6R454 | IL6R455 | IL6R456 | IL6R457 | IL6R458 | IL6R459 | IL6R460 | IL6R461 | IL6R462 | IL6R463 | IL6R464 | IL6R465 | IL6R466 | IL6R467 | IL6R468 | IL6R469 | IL6R470 | IL6R471 | IL6R472 | IL6R473 | IL6R474 | IL6R475 | IL6R476 | IL6R477 | IL6R478 | IL6R479 | IL6R480 | IL6R481 | IL6R482 | IL6R483 | IL6R484 | IL6R485 | IL6R486 | IL6R487 | IL6R488 | IL6R489 | IL6R490 | IL6R491 | IL6R492 | IL6R493 | IL6R494 | IL6R495 | IL6R496 | IL6R497 | IL6R498 | IL6R499 | IL6R500 | IL6R501 | IL6R502 | IL6R503 | IL6R504 | IL6R505 | IL6R506 | IL6R507 | IL6R508 | IL6R509 | IL6R510 | IL6R511 | IL6R512 | IL6R513 | IL6R514 | IL6R515 | IL6R516 | IL6R517 | IL6R518 | IL6R519 | IL6R520 | IL6R521 | IL6R522 | IL6R523 | IL6R524 | IL6R525 | IL6R526 | IL6R527 | IL6R528 | IL6R529 | IL6R530 | IL6R531 | IL6R532 | IL6R533 | IL6R534 | IL6R535 | IL6R536 | IL6R537 | IL6R538 | IL6R539 | IL6R540 | IL6R541 | IL6R542 | IL6R543 | IL6R544 | IL6R545 | IL6R546 | IL6R547 | IL6R548 | IL6R549 | IL6R550 | IL6R551 | IL6R552 | IL6R553 | IL6R554 | IL6R555 | IL6R556 | IL6R557 | IL6R558 | IL6R559 | IL6R560 | IL6R561 | IL6R562 | IL6R563 | IL6R564 | IL6R565 | IL6R566 | IL6R567 | IL6R568 | IL6R569 | IL6R570 | IL6R571 | IL6R572 | IL6R573 | IL6R574 | IL6R575 | IL6R576 | IL6R577 | IL6R578 | IL6R579 | IL6R580 | IL6R581 | IL6R582 | IL6R583 | IL6R584 | IL6R585 | IL6R586 | IL6R587 | IL6R588 | IL6R589 | IL6R590 | IL6R591 | IL6R592 | IL6R593 | IL6R594 | IL6R595 | IL6R596 | IL6R597 | IL6R598 | IL6R599 | IL6R600 | IL6R601 | IL6R602 | IL6R603 | IL6R604 | IL6R605 | IL6R606 | IL6R607 | IL6R608 | IL6R609 | IL6R610 | IL6R611 | IL6R612 | IL6R613 | IL6R614 | IL6R615 | IL6R616 | IL6R617 | IL6R618 | IL6R619 | IL6R620 | IL6R621 | IL6R622 | IL6R623 | IL6R624 | IL6R625 | IL6R626 | IL6R627 | IL6R628 | IL6R629 | IL6R630 | IL6R631 | IL6R632 | IL6R633 | IL6R634 | IL6R635 | IL6R636 | IL6R637 | IL6R638 | IL6R639 | IL6R640 | IL6R641 | IL6R642 | IL6R643 | IL6R644 | IL6R645 | IL6R646 | IL6R647 | IL6R648 | IL6R649 | IL6R650 | IL6R651 | IL6R652 | IL6R653 | IL6R654 | IL6R655 | IL6R656 | IL6R657 | IL6R658 | IL6R659 | IL6R660 | IL6R661 | IL6R662 | IL6R663 | IL6R664 | IL6R665 | IL6R666 | IL6R667 | IL6R668 | IL6R669 | IL6R670 | IL6R671 | IL6R672 | IL6R673 | IL6R674 | IL6R675 | IL6R676 | IL6R677 | IL6R678 | IL6R679 | IL6R680 | IL6R681 | IL6R682 | IL6R683 | IL6R684 | IL6R685 | IL6R686 | IL6R687 | IL6R688 | IL6R689 | IL6R690 | IL6R691 | IL6R692 | IL6R693 | IL6R694 | IL6R695 | IL6R696 | IL6R697 | IL6R698 | IL6R699 | IL6R700 | IL6R701 | IL6R702 | IL6R703 | IL6R704 | IL6R705 | IL6R706 | IL6R707 | IL6R708 | IL6R709 | IL6R710 | IL6R711 | IL6R712 | IL6R713 | IL6R714 | IL6R715 | IL6R716 | IL6R717 | IL6R718 | IL6R719 | IL6R720 | IL6R721 | IL6R722 | IL6R723 | IL6R724 | IL6R725 | IL6R726 | IL6R727 | IL6R728 | IL6R729 | IL6R730 | IL6R731 | IL6R732 | IL6R733 | IL6R734 | IL6R735 | IL6R736 | IL6R737 | IL6R738 | IL6R739 | IL6R740 | IL6R741 | IL6R742 | IL6R743 | IL6R744 | IL6R745 | IL6R746 | IL6R747 | IL6R748 | IL6R749 | IL6R750 | IL6R751 | IL6R752 | IL6R753 | IL6R754 | IL6R755 | IL6R756 | IL6R757 | IL6R758 | IL6R759 | IL6R760 | IL6R761 | IL6R762 | IL6R763 | IL6R764 | IL6R765 | IL6R766 | IL6R767 | IL6R768 | IL6R769 | IL6R770 | IL6R771 | IL6R772 | IL6R773 | IL6R774 | IL6R775 | IL6R776 | IL6R777 | IL6R778 | IL6R779 | IL6R780 | IL6R781 | IL6R782 | IL6R783 | IL6R784 | IL6R785 | IL6R786 | IL6R787 | IL6R788 | IL6R789 | IL6R790 | IL6R791 | IL6R792 | IL6R793 | IL6R794 | IL6R795 | IL6R796 | IL6R797 | IL6R798 | IL6R799 | IL6R800 | IL6R801 | IL6R802 | IL6R803 | IL6R804 | IL6R805 | IL6R806 | IL6R807 | IL6R808 | IL6R809 | IL6R810 | IL6R811 | IL6R812 | IL6R813 | IL6R814 | IL6R815 | IL6R816 | IL6R817 | IL6R818 | IL6R819 | IL6R820 | IL6R821 | IL6R822 | IL6R823 | IL6R824 | IL6R825 | IL6R826 | IL6R827 | IL6R828 | IL6R829 | IL6R830 | IL6R831 | IL6R832 | IL6R833 | IL6R834 | IL6R835 | IL6R836 | IL6R837 | IL6R838 | IL6R839 | IL6R840 | IL6R841 | IL6R842 | IL6R843 | IL6R844 | IL6R845 | IL6R846 | IL6R847 | IL6R848 | IL6R849 | IL6R850 | IL6R851 | IL6R852 | IL6R853 | IL6R854 | IL6R855 | IL6R856 | IL6R857 | IL6R858 | IL6R859 | IL6R860 | IL6R861 | IL6R862 | IL6R863 | IL6R864 | IL6R865 | IL6R866 | IL6R867 | IL6R868 | IL6R869 | IL6R870 | IL6R871 | IL6R872 | IL6R873 | IL6R874 | IL6R875 | IL6R876 | IL6R877 | IL6R878 | IL6R879 | IL6R880 | IL6R881 | IL6R882 | IL6R883 | IL6R884 | IL6R885 | IL6R886 | IL6R887 | IL6R888 | IL6R889 | IL6R890 | IL6R891 | IL6R892 | IL6R893 | IL6R894 | IL6R895 | IL6R896 | IL6R897 | IL6R898 | IL6R899 | IL6R900 | IL6R901 | IL6R902 | IL6R903 | IL6R904 | IL6R905 | IL6R906 | IL6R907 | IL6R908 | IL6R909 | IL6R910 | IL6R911 | IL6R912 | IL6R913 | IL6R914 | IL6R915 | IL6R916 | IL6R917 | IL6R918 | IL6R919 | IL6R920 | IL6R921 | IL6R922 | IL6R923 | IL6R924 | IL6R925 | IL6R926 | IL6R927 | IL6R928 | IL6R929 | IL6R930 | IL6R931 | IL6R932 | IL6R933 | IL6R934 | IL6R935 | IL6R936 | IL6R937 | IL6R938 | IL6R939 | IL6R940 | IL6R941 | IL6R942 | IL6R943 | IL6R944 | IL6R945 | IL6R946 | IL6R947 | IL6R948 | IL6R949 | IL6R950 | IL6R951 | IL6R952 | IL6R953 | IL6R954 | IL6R955 | IL6R956 | IL6R957 | IL6R958 | IL6R959 | IL6R960 | IL6R961 | IL6R962 | IL6R963 | IL6R964 | IL6R965 | IL6R966 | IL6R967 | IL6R968 | IL6R969 | IL6R970 | IL6R971 | IL6R972 | IL6R973 | IL6R974 | IL6R975 | IL6R976 | IL6R977 | IL6R978 | IL6R979 | IL6R980 | IL6R981 | IL6R982 | IL6R983 | IL6R984 | IL6R985 | IL6R986 | IL6R987 | IL6R988 | IL6R989 | IL6R990 | IL6R991 | IL6R992 | IL6R993 | IL6R994 | IL6R995 | IL6R996 | IL6R997 | IL6R998 | IL6R999 | IL6R1000 | IL6R1001 | IL6R1002 | IL6R1003 | IL6R1004 | IL6R1005 | IL6R1006 | IL6R1007 | IL6R1008 | IL6R1009 | IL6R1010 | IL6R1011 | IL6R1012 | IL6R1013 | IL6R1014 | IL6R1015 | IL6R1016 | IL6R1017 | IL6R1018 | IL6R1019 | IL6R1020 | IL6R1021 | IL6R1022 | IL6R1023 | IL6R1024 | IL6R1025 | IL6R1026 | IL6R1027 | IL6R1028 | IL6R1029 | IL6R1030 | IL6R1031 | IL6R1032 | IL6R1033 | IL6R1034 | IL6R1035 | IL6R1036 | IL6R1037 | IL6R1038 | IL6R1039 | IL6R1040 | IL6R1041 | IL6R1042 | IL6R1043 | IL6R1044 | IL6R1045 | IL6R1046 | IL6R1047 | IL6R1048 | IL6R1049 | IL6R1050 | IL6R1051 | IL6R1052 | IL6R1053 | IL6R1054 | IL6R1055 | IL6R1056 | IL6R1057 | IL6R1058 | IL6R1059 | IL6R1060 | IL6R1061 | IL6R1062 | IL6R1063 | IL6R1064 | IL6R1065 | IL6R1066 | IL6R1067 | IL6R1068 | IL6R1069 | IL6R1070 | IL6R1071 | IL6R1072 | IL6R1073 | IL6R1074 | IL6R1075 | IL6R1076 | IL6R1077 | IL6R1078 | IL6R1079 | IL6R1080 | IL6R1081 | IL6R1082 | IL6R1083 | IL6R1084 | IL6R1085 | IL6R1086 | IL6R1087 | IL6R1088 | IL6R1089 | IL6R1090 | IL6R1091 | IL6R1092 | IL6R1093 | IL6R1094 | IL6R1095 | IL6R1096 | IL6R1097 | IL6R1098 | IL6R1099 | IL6R1100 | IL6R1101 | IL6R1102 | IL6R1103 | IL6R1104 | IL6R1105 | IL6R1106 | IL6R1107 | IL6R1108 | IL6R1109 | IL6R1110 | IL6R1111 | IL6R1112 | IL6R1113 | IL6R1114 | IL6R1115 |

[illegible][illegible]

**Specificity description of antibodies used in the western blot. The descriptions are provided by the suppliers and the text is derived from datasheets dedicated to particular antibodies**

### **1. Rabbit polyclonal anti-BECN1 antibody (sc-11427)**

BECN1 (H-300) is recommended for detection of BECN1 of mouse, rat and human origin by Western Blotting (starting dilution 1:200, dilution range 1:100- 1:1000), immunoprecipitation [1-2 µg per 100-500 µg of total protein (1 ml of cell lysate)], immunofluorescence (starting dilution 1:50, dilution range 1:50- 1:500) and immunohistochemistry (including paraffin-embedded sections) (starting dilution 1:50, dilution range 1:50-1:500).

BECN1 (H-300) is also recommended for detection of BECN1 in additional species, including equine, canine, bovine, porcine and avian.

Suitable for use as control antibody for BECN1 siRNA (h): sc-29797, BECN1 siRNA (m): sc-29798, BECN1 shRNA Plasmid (h): sc-29797-SH, BECN1 shRNA Plasmid (m): sc-29798-SH, BECN1 shRNA (h) Lentiviral Particles: sc-29797-V and BECN1 shRNA (m) Lentiviral Particles: sc-29798-V.

Molecular Weight of BECN1: 60 kDa.

Positive Controls: BECN1 (m): 293T Lysate: sc-125053, MCF7 whole cell lysate: sc-2206 or NIH/3T3 whole cell lysate: sc-2210.

### **2. Mouse monoclonal anti-β-actin antibody (sc-47778)**

β-Actin (C4) is recommended for detection of β-Actin of mouse, rat, human, avian, bovine, canine, porcine, rabbit, Dictyostelium discoideum and Physarum polycephalum origin by Western Blotting (starting dilution 1:200, dilution range 1:100-1:1000), immunoprecipitation [1-2 µg per 100-500 µg of total protein (1 ml of cell lysate)], immunofluorescence (starting dilution 1:50, dilution range 1:50-1:500), immunohistochemistry (including paraffinembedded sections) (starting dilution 1:50, dilution range 1:50- 1:500) and solid phase ELISA (starting dilution 1:30, dilution range 1:30-1:3000); may cross-react with all six known isoforms of Actin in higher vertebrates (including cytoplasmic β- and γ-Actin isoforms, skeletal, cardiac, and vascular α-Actin isoforms, and enteric γ-Actin isoform).

Suitable for use as control antibody for β-Actin siRNA (h): sc-108069, β-Actin siRNA (m): sc-108070, β-Actin siRNA (r): sc-156106, β-Actin shRNA Plasmid (h): sc-108069-SH, β-Actin shRNA Plasmid (m): sc-108070-SH, β-Actin shRNA Plasmid (r): sc-156106-SH, β-Actin shRNA (h) Lentiviral Particles: sc-108069-V, β-Actin shRNA (m) Lentiviral Particles: sc-108070-V and β-Actin shRNA (r) Lentiviral Particles: sc-156106-V.

β-Actin (C4) X TransCruz antibody is recommended for Gel Supershift and ChIP applications.

Molecular Weight of β-Actin/C-terminal region of β-Actin: 43/15 kDa.

### **3. Mouse monoclonal anti-MAP1LC3AB antibody (sc-398822)**

MAP LC3α/b (G-4) is recommended for detection of MAP LC3α and MAP LC3b of mouse, rat and human origin and MAP LC3b2 of human origin by Western Blotting (starting dilution 1:100, dilution range 1:100- 1:1000), immunoprecipitation [1-2 µg per 100-500 µg of total protein (1 ml of cell lysate)], immunofluorescence (starting dilution 1:50, dilution range 1:50- 1:500) and solid phase ELISA (starting dilution 1:30, dilution range 1:30- 1:3000).

Suitable for use as control antibody for MAP LC3α/b siRNA (m): sc-156052, MAP LC3α/b shRNA Plasmid (m): sc-156052-SH and MAP LC3α/b shRNA (m) Lentiviral Particles: sc-156052-V.

Molecular Weight of MAP LC3α isoforms: 15/18 kDa.

Molecular Weight of MAP LC3b: 15 kDa.

Positive Controls: HT-1080 whole cell lysate: sc-364183, Saos-2 cell lysate: sc-2235 or U-251-MG whole cell lysate: sc-364176.

#### **4. Mouse monoclonal anti-nucleoporin p62 antibody (sc-48373)**

Nucleoporin p62 (C-9) is recommended for detection of nucleoporin p62 of mouse, rat and human origin by Western Blotting (starting dilution 1:100, dilution range 1:100-1:1000), immunoprecipitation [1-2 µg per 100-500 µg of total protein (1 ml of cell lysate)], immunofluorescence (starting dilution 1:50, dilution range 1:50-1:500), immunohistochemistry (including paraffinembedded sections) (starting dilution 1:50, dilution range 1:50-1:500) and solid phase ELISA (starting dilution 1:30, dilution range 1:30-1:3000).

Suitable for use as control antibody for nucleoporin p62 siRNA (h): sc-36107, nucleoporin p62 siRNA (m): sc-36108, nucleoporin p62 shRNA Plasmid (h): sc-36107-SH, nucleoporin p62 shRNA Plasmid (m): sc-36108-SH, nucleoporin p62 shRNA (h) Lentiviral Particles: sc-36107-V and nucleoporin p62 shRNA (m) Lentiviral Particles: sc-36108-V.

Molecular Weight of nucleoporin p62: 62 kDa.

#### **5. Rabbit polyclonal anti-GPR30 antibody (sc-134576)**

GPR30 (H-300) is recommended for detection of GPR30 of mouse, rat and human origin by Western Blotting (starting dilution 1:200, dilution range 1:100-1:1000), immunoprecipitation [1-2 µg per 100-500 µg of total protein (1 ml of cell lysate)], immunofluorescence (starting dilution 1:50, dilution range 1:50-1:500), immunohistochemistry (including paraffin-embedded sections) (starting dilution 1:50, dilution range 1:50-1:500) and solid phase ELISA (starting dilution 1:30, dilution range 1:30-1:3000).

GPR30 (H-300) is also recommended for detection of GPR30 in additional species, including canine and bovine. GPR30 (H-300) is also recommended for detection of GPR30 in additional species, including canine and bovine.

Suitable for use as control antibody for GPR30 siRNA (h): sc-60743, GPR30 siRNA (m): sc-60744, GPR30 siRNA (r): sc-156143, GPR30 shRNA Plasmid (h): sc-60743-SH, GPR30 shRNA Plasmid (m): sc-60744-SH, GPR30 shRNA Plasmid (r): sc-156143-SH, GPR30 shRNA (h) Lentiviral Particles: sc-60743-V, GPR30 shRNA (m) Lentiviral Particles: sc-60744-V and GPR30 shRNA (r) Lentiviral Particles: sc-156143-V.

Molecular Weight of GPR30: 38 kDa.

#### **6. Mouse monoclonal anti-CYP1A1 antibody (sc-25304)**

CYP1A1 (B-4) is recommended for detection of CYP1A1 of mouse, rat and human origin by Western Blotting (starting dilution 1:100, dilution range 1:100-1:500), immunoprecipitation [1-2 µg per 100-500 µg of total protein (1 ml of cell lysate)], immunofluorescence (starting dilution 1:50, dilution range 1:50-1:500), immunohistochemistry (including paraffin-embedded sections) (starting dilution 1:50, dilution range 1:50-1:500) and solid phase ELISA (starting dilution 1:30, dilution range 1:30-1:3000).

Suitable for use as control antibody for CYP1A1 siRNA (h): sc-41483, CYP1A1 siRNA (m): sc-41484, CYP1A1 siRNA (r): sc-270346, CYP1A1 shRNA Plasmid (h): sc-41483-SH, CYP1A1 shRNA Plasmid (m): sc-41484-SH, CYP1A1 shRNA Plasmid (r): sc-270346-SH, CYP1A1 shRNA (h) Lentiviral Particles: sc-41483-V, CYP1A1 shRNA (m) Lentiviral Particles: sc-41484-V and CYP1A1 shRNA (r) Lentiviral Particles: sc-270346-V.

Molecular Weight of CYP1A1: 56 kDa.

### **7. Rabbit polyclonal anti-GSK-3 $\beta$ antibody (sc-9166)**

GSK-3 $\beta$  (H-76) is recommended for detection of GSK-3 $\beta$  of mouse, rat, human, *Xenopus laevis* and zebrafish origin by Western Blotting (starting dilution 1:200, dilution range 1:100-1:1000), immunoprecipitation [1-2  $\mu$ g per 100-500  $\mu$ g of total protein (1 ml of cell lysate)], immunofluorescence (starting dilution 1:50, dilution range 1:50-1:500), immunohistochemistry (including paraffin-embedded sections) (starting dilution 1:50, dilution range 1:50-1:500) and solid phase ELISA (starting dilution 1:30, dilution range 1:30-1:3000).

GSK-3 $\beta$  (H-76) is also recommended for detection of GSK-3 $\beta$  in additional species, including equine, canine, bovine, porcine and avian.

Suitable for use as control antibody for GSK-3 $\beta$  siRNA (h): sc-35527, GSK-3 $\beta$  siRNA (m): sc-35525, GSK-3 $\beta$  shRNA Plasmid (h): sc-35527-SH, GSK-3 $\beta$  shRNA Plasmid (m): sc-35525-SH, GSK-3 $\beta$  shRNA (h) Lentiviral Particles: sc-35527-V and GSK-3 $\beta$  shRNA (m) Lentiviral Particles: sc-35525-V.

Molecular Weight of GSK-3 $\beta$ : 47 kDa.

Positive Controls: K-562 whole cell lysate: sc-2203, Jurkat whole cell lysate: sc-2204 or HeLa whole cell lysate: sc-2200.

### **8. Rabbit polyclonal anti-ESR1 antibody (sc-7207)**

ER $\alpha$  (H-184) is recommended for detection of estrogen receptor  $\alpha$  of mouse, rat and human origin by Western Blotting (starting dilution 1:200, dilution range 1:100-1:1000), immunoprecipitation [1-2  $\mu$ g per 100-500  $\mu$ g of total protein (1 ml of cell lysate)], immunofluorescence and immunohistochemistry (including paraffin-embedded sections) (starting dilution 1:50, dilution range 1:50-1:500).

Suitable for use as control antibody for ER $\alpha$  siRNA (h): sc-29305 and ER $\alpha$  siRNA (m): sc-29306.

ER $\alpha$  (H-184) X TransCruz antibody is recommended for Gel Supershift and ChIP applications.

Molecular Weight of ER $\alpha$ : 66 kDa.

Positive Controls: MCF7 whole cell lysate: sc-2206, human breast carcinoma: sc-4260 WB.

### **9. Goat polyclonal anti-ESR2 antibody (sc-6822)**

ER $\beta$  (L-20) is recommended for detection of ER $\beta$  of human and, to a lesser extent, mouse and rat origin by Western Blotting (starting dilution 1:200, dilution range 1:100-1:1000), immunofluorescence (starting dilution 1:50, dilution range 1:50-1:500) and solid phase ELISA (starting dilution 1:30, dilution range 1:30-1:3000).

ER $\beta$  (L-20) is also recommended for detection of ER $\beta$  in additional species, including canine.

Suitable for use as control antibody for ER $\beta$  siRNA (h): sc-35325, ER $\beta$  siRNA (m): sc-35326, ER $\beta$  shRNA Plasmid (h): sc-35325-SH, ER $\beta$  shRNA Plasmid (m): sc-35326-SH, ER $\beta$  shRNA (h) Lentiviral Particles: sc-35325-V and ER $\beta$  shRNA (m) Lentiviral Particles: sc-35326-V.

ER $\beta$  (L-20) X TransCruz antibody is recommended for Gel Supershift and ChIP applications.

Molecular Weight of ER $\beta$ : 56 kDa.

### **10. Goat polyclonal anti-AHR antibody (sc-8088)**

Ah Receptor (N-19) is recommended for detection of Ah Receptor of mouse, rat, human and zebrafish origin by Western Blotting (starting dilution 1:200, dilution range 1:100-1:1000), immunoprecipitation [1-



## Supplementary material 7 – S7

2 µg per 100-500 µg of total protein (1 ml of cell lysate)], immunofluorescence (starting dilution 1:50, dilution range 1:50-1:500) and solid phase ELISA (starting dilution 1:30, dilution range 1:30-1:3000).

Ah Receptor (N-19) is also recommended for detection of Ah Receptor in additional species, including canine, bovine and porcine.

Suitable for use as control antibody for Ah Receptor siRNA (h): sc-29654, Ah Receptor siRNA (m): sc-29655, Ah Receptor shRNA Plasmid (h): sc-29654-SH, Ah Receptor shRNA Plasmid (m): sc-29655-SH, Ah Receptor shRNA (h) Lentiviral Particles: sc-29654-V and Ah Receptor shRNA (m) Lentiviral Particles: sc-29655-V.

Ah Receptor (N-19) X TransCruz antibody is recommended for Gel Supershift and ChIP applications.

Molecular Weight (predicted) of Ah Receptor: 96 kDa.

Molecular Weight (observed) of Ah Receptor: 122 kDa.

Positive Controls: HeLa whole cell lysate: sc-2200.

### 11. Rabbit polyclonal anti-ARNT antibody (sc-5580)

Arnt 1 (H-172) is recommended for detection of Arnt 1 of mouse, rat and human origin by Western Blotting (starting dilution 1:200, dilution range 1:100-1:1000), immunoprecipitation [1-2 µg per 100-500 µg of total protein (1 ml of cell lysate)], immunofluorescence (starting dilution 1:50, dilution range 1:50-1:500), immunohistochemistry (including paraffin-embedded sections) (starting dilution 1:50, dilution range 1:50-1:500) and solid phase ELISA (starting dilution 1:30, dilution range 1:30-1:3000).

Arnt 1 (H-172) is also recommended for detection of Arnt 1 in additional species, including equine, canine, bovine and porcine.

Suitable for use as control antibody for Arnt 1 siRNA (h): sc-29733, Arnt 1 siRNA (m): sc-29734, Arnt 1 shRNA Plasmid (h): sc-29733-SH, Arnt 1 shRNA Plasmid (m): sc-29734-SH, Arnt 1 shRNA (h) Lentiviral Particles: sc-29733-V and Arnt 1 shRNA (m) Lentiviral Particles: sc-29734-V.

Arnt 1 (H-172) X TransCruz antibody is recommended for Gel Supershift and ChIP applications.

Molecular Weight of Arnt 1: 95 kDa.

### 12. Mouse monoclonal anti-BCL-2 antibody (sc-7382)

Bcl-2 (C-2) is recommended for detection of Bcl-2 of mouse, rat and human origin by Western Blotting (starting dilution 1:200, dilution range 1:100-1:1000), immunoprecipitation [1-2 µg per 100-500 µg of total protein (1 ml of cell lysate)], immunofluorescence (starting dilution 1:50, dilution range 1:50-1:500), immunohistochemistry (including paraffin-embedded sections) (starting dilution 1:50, dilution range 1:50-1:500) and flow cytometry (1 µg per 1 x 10<sup>6</sup> cells).

Suitable for use as control antibody for Bcl-2 siRNA (h): sc-29214, Bcl-2 siRNA (m): sc-29215, Bcl-2 shRNA Plasmid (h): sc-29214-SH, Bcl-2 shRNA Plasmid (m): sc-29215-SH, Bcl-2 shRNA (h) Lentiviral Particles: sc-29214-V and Bcl-2 shRNA (m) Lentiviral Particles: sc-29215-V.

Molecular Weight of Bcl-2: 26 kDa.

### 13. Mouse monoclonal anti-BAX antibody (sc-7480)

Bax (B-9) is recommended for detection of Bax $\alpha$  and Bax $\beta$  of mouse, rat and human origin by Western Blotting (starting dilution 1:200, dilution range 1:100-1:1000), immunoprecipitation [1-2 µg per 100-500 µg of total protein (1 ml of cell lysate)], immunofluorescence (starting dilution 1:50, dilution range 1:50-

## Supplementary material 7 – S7

1:500), immunohistochemistry (including paraffin-embedded sections) (starting dilution 1:50, dilution range 1:50-1:500) and flow cytometry (1 µg per 1 x 10<sup>6</sup> cells).

Suitable for use as control antibody for Bax siRNA (h): sc-29212, Bax siRNA (m): sc-29213, Bax shRNA Plasmid (h): sc-29212-SH, Bax shRNA Plasmid (m): sc-29213-SH, Bax shRNA (h) Lentiviral Particles: sc-29212-V and Bax shRNA (m) Lentiviral Particles: sc-29213-V.

Molecular Weight of Bax: 23 kDa.

Positive Controls: Raji whole cell lysate: sc-364236, NAMALWA cell lysate: sc-2234 or Jurkat whole cell lysate: sc-2204.

### 14. Mouse monoclonal anti-ATG7 antibody (sc-376212)

ATG7 (B-9) is recommended for detection of ATG7 of mouse, rat and human origin by Western Blotting (starting dilution 1:100, dilution range 1:100- 1:1000), immunoprecipitation [1-2 µg per 100-500 µg of total protein (1 ml of cell lysate)], immunofluorescence (starting dilution 1:50, dilution range 1:50-1:500) and solid phase ELISA (starting dilution 1:30, dilution range 1:30- 1:3000).

Suitable for use as control antibody for ATG7 siRNA (h): sc-41447, ATG7 siRNA (m): sc-41448, ATG7 shRNA Plasmid (h): sc-41447-SH, ATG7 shRNA Plasmid (m): sc-41448-SH, ATG7 shRNA (h) Lentiviral Particles: sc-41447-V and ATG7 shRNA (m) Lentiviral Particles: sc-41448-V.

Molecular Weight of ATG7: 71 kDa.

Positive Controls: HeLa whole cell lysate: sc-2200, Jurkat whole cell lysate: sc-2204 or Caki-1 cell lysate: sc-2224.

### 15. Polyclonal rabbit anti-constitutive androstane receptor antibody (ab-228767)

Product name: Anti-Constitutive androstane receptor antibody

Description: Rabbit polyclonal to Constitutive androstane receptor

Host species: Rabbit Tested applications

Suitable for: WB Species reactivity

Reacts with: Mouse

Predicted to work with: Human, Chimpanzee, Rhesus monkey

Immunogen: Recombinant fragment within Human Constitutive androstane receptor (internal sequence). The exact sequence is proprietary. Database link: Q14994

Positive control WB: Mouse liver lysate.

General notes: The Life Science industry has been in the grips of a reproducibility crisis for a number of years. Abcam is leading the way in addressing this with our range of recombinant monoclonal antibodies and knockout edited cell lines for gold-standard validation. Please check that this product meets your needs before purchasing. If you have any questions, special requirements or concerns, please send us an inquiry and/or contact our Support team ahead of purchase.

Function: binds and transactivates the retinoic acid response elements that control expression of the retinoic acid receptor beta 2 and alcohol dehydrogenase 3 genes. Transactivates both the phenobarbital responsive element module of the human CYP2B6 gene and the CYP3A4 xenobiotic response element.

Tissue specificity: predominantly expressed in liver.

## Supplementary material 7 – S7

Sequence similarities: belongs to the nuclear hormone receptor family. NR1 subfamily. Contains 1 nuclear receptor DNA-binding domain.

Domain: composed by a short N-terminal domain followed by the DNA binding, hinge, and ligand binding/dimerization domains.

Post-translational modifications: Phosphorylated at Thr-38 by PKC, dephosphorylation of Thr-38 is required for nuclear translocation and activation.

Cellular localization: nucleus. Cytoplasm. Cytoplasm > cytoskeleton. Recruited to the cytoplasm by DNAJC7.

Predicted band size: 40 kDa

### **16. Rabbit polyclonal anti-aromatase antibody (ab-18995)**

Product name: Anti-Aromatase antibody

Description: Rabbit polyclonal to Aromatase

Host species: Rabbit

Tested applications: suitable for: IHC-P, ICC/IF, IHC-Fr, WBmore details

Species reactivity: reacts with: Mouse, Rat, Human

Predicted to work with: Chicken, Cow, Pig

Immunogen: synthetic peptide surrounding amino acid 385 of human Aromatase (Peptide available as ab51924.)

General notes: The Life Science industry has been in the grips of a reproducibility crisis for a number of years. Abcam is leading the way in addressing this with our range of recombinant monoclonal antibodies and knockout edited cell lines for gold-standard validation. Please check that this product meets your needs before purchasing.

Function: catalyzes the formation of aromatic C18 estrogens from C19 androgens.

Tissue specificity: brain, placenta and gonads.

Involvement in disease: defects in CYP19A1 are a cause of aromatase excess syndrome (AEXS) [MIM:139300]; also known as familial gynecomastia. AEXS is characterized by an estrogen excess due to an increased aromatase activity. Defects in CYP19A1 are the cause of aromatase deficiency (AROD) [MIM:107910]. AROD is a rare disease in which fetal androgens are not converted into estrogens due to placental aromatase deficiency. Thus, pregnant women exhibit a hirsutism, which spontaneously resolves after post-partum. At birth, female babies present with pseudohermaphroditism due to virilization of external genital organs. In adult females, manifestations include delay of puberty, breast hypoplasia and primary amenorrhoea with multicystic ovaries.

Sequence similarities: belongs to the cytochrome P450 family.

Cellular localization: membrane.

Predicted band size: 58 kDa

Observed band size: 58 kDa

Additional bands at: 34 kDa. Supplier is unsure as to the identity of these extra bands.
